# Supplementary material for: Basically, nucleophilicity matters little: towards unravelling the supramolecular driving forces in enzyme-like CO2 conversion
Source: Royal Society of Chemistry journal article supplement (doi:10.1039/d2ob00948j), 2022-01-01
Supplement: d2ob00948j1.pdf [file d2ob00948j1.pdf]

## Electronic Supplementary Information

### Basically, nucleophilicity matters little: towards unravelling the supramolecular driving forces in enzyme-like CO<sub>2</sub> conversion

Ferran Esteve,<sup>\*a</sup> Belén Altava,<sup>a</sup> Santiago V. Luis,<sup>a</sup> Eduardo García-Verdugo<sup>\*a</sup>

<sup>a</sup> Departamento de Química Inorgánica y Orgánica, Universitat Jaume I, Av. Sos Baynat s/n, Castellón, 12071, Spain.

Email: estevef@uji.es; cepeda@uji.es

## Table of Contents

|                                                                                                                    |           |
|--------------------------------------------------------------------------------------------------------------------|-----------|
| <b>Fig. S1.</b> DFT optimized structures for <b>TS1–TS3</b> .....                                                  | <b>S1</b> |
| <b>Fig. S2.</b> <sup>1</sup> H NMR spectra in the presence of CO <sub>2</sub> .....                                | <b>S2</b> |
| <b>Fig. S3.</b> HRMS (ESI-) analysis of <b>1</b> : <b>TBA</b> Benzoate .....                                       | <b>S2</b> |
| <b>Fig. S4.</b> HRMS-ESI (-) competition experiment for <b>1</b> : <b>TBAX</b> .....                               | <b>S3</b> |
| <b>Fig. S5.</b> DFT catalytic cycle comparison in the presence of Cl <sup>-</sup> and I <sup>-</sup> .....         | <b>S3</b> |
| <b>Fig. S6.</b> Partial <sup>1</sup> H NMR spectra for <b>1</b> and <b>2</b> .....                                 | <b>S4</b> |
| <b>Fig. S7.</b> Partial <sup>1</sup> H NMR spectra for <b>1</b> and <b>3</b> .....                                 | <b>S4</b> |
| <b>Fig. S8.</b> DFT optimized structures for <b>1</b> and <b>3</b> .....                                           | <b>S5</b> |
| <b>Fig. S9.</b> DFT optimized structures for [ <b>1</b> ·Cl <sup>-</sup> ] and [ <b>3</b> ·Cl <sup>-</sup> ] ..... | <b>S5</b> |
| <br>                                                                                                               |           |
| <b>DFT calculation details</b> .....                                                                               | <b>S6</b> |

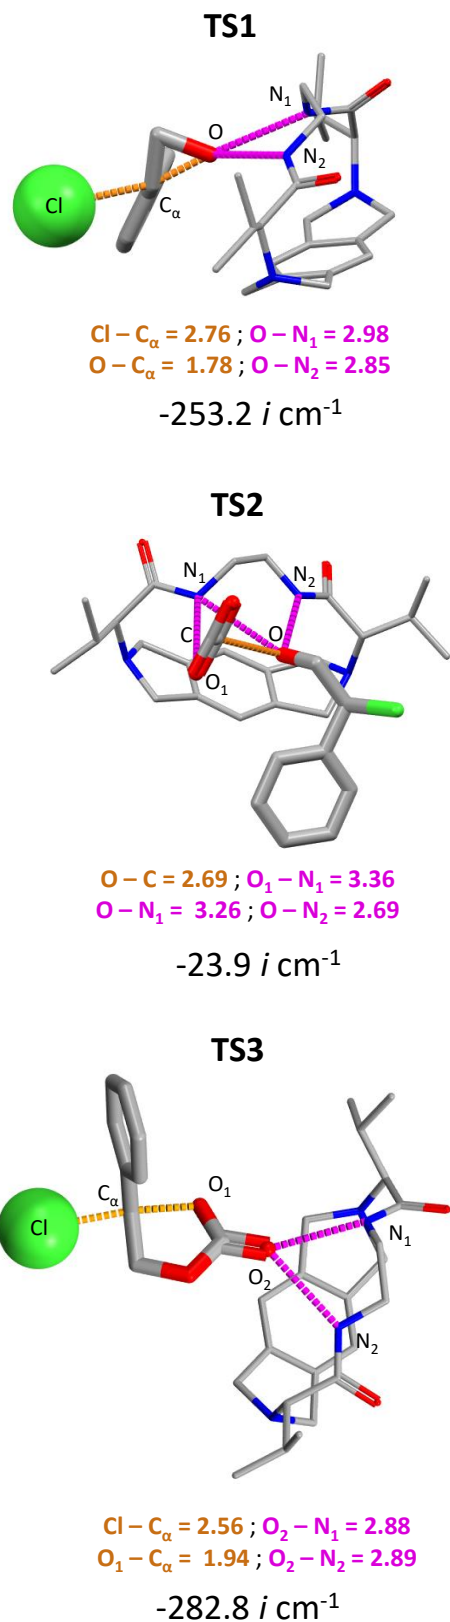

**Fig. S1.** DFT (B3LYP) optimized structures for the transition states **TS1–TS3** together with the most relevant calculated distances (magenta discontinuous lines for hydrogen bonding and orange discontinuous lines for characteristic bond formation/breaking of each TS). The values of the negative (imaginary) vibrational frequencies have also been included.

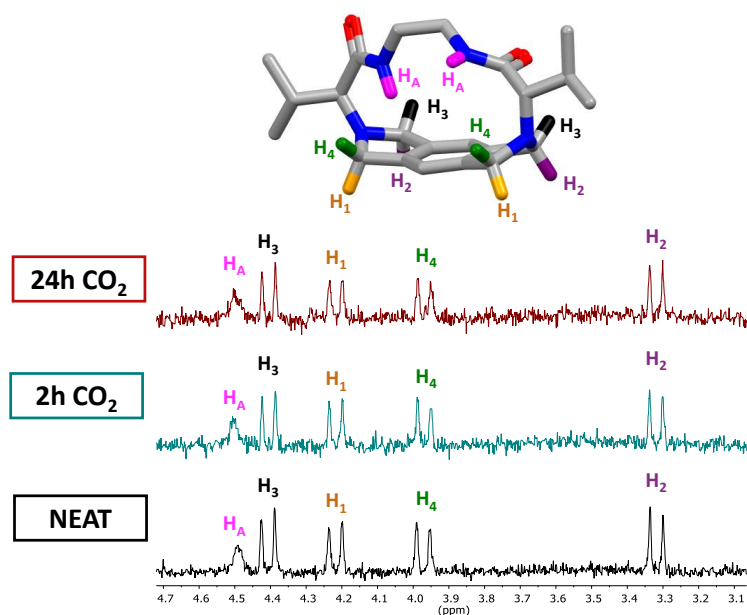

**Fig. S2.** Time evolution of the  $^1\text{H}$  NMR (500 MHz, benzene- $d_6$ , 25  $^\circ\text{C}$ ) partial spectra of macrocycle **1** in the presence of  $\text{CO}_2$  (10 bar). The 4.7 – 3.1 region has been selected as it contains the signals for the diastereotopic isoindolinic protons adjacent to the tertiary amino groups. The relevant hydrogen atoms have been highlighted with different colours.

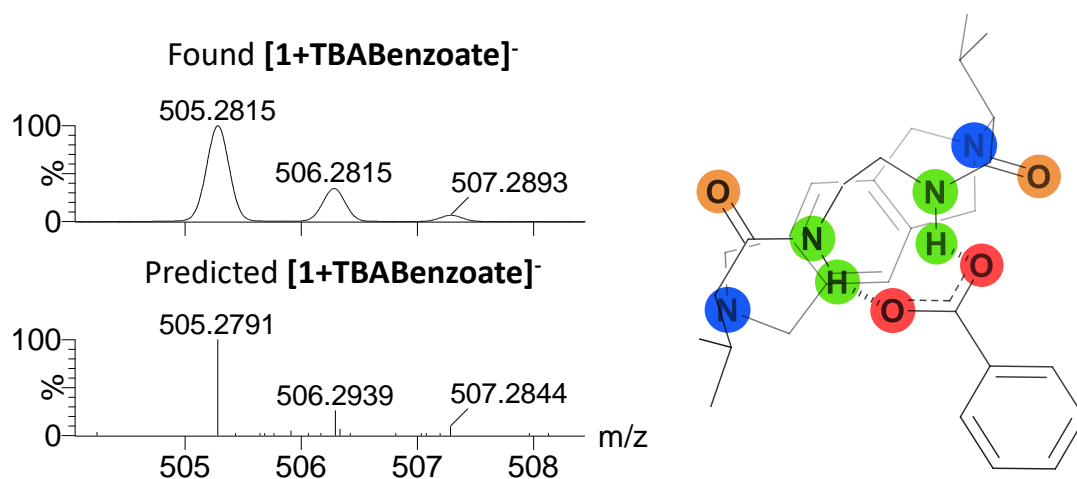

**Fig. S3.** HRMS (ESI-) analysis of a 1:10 mixture **1** : **TBABenzoate** in methanol. Below: predicted mass spectrum for the supramolecular complex. Above: experimental mass spectrum.

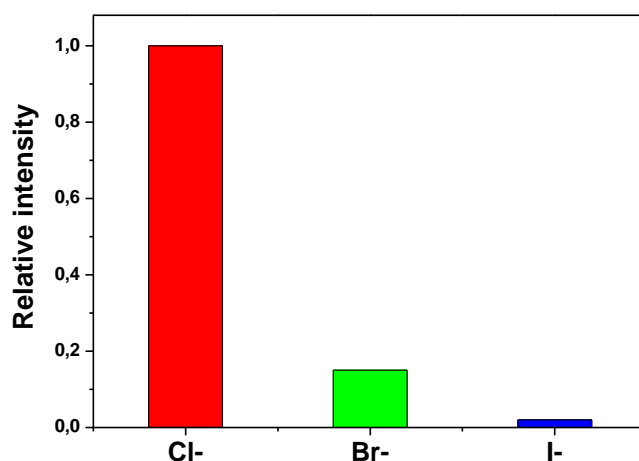

**Fig. S4.** HRMS-ESI (-) relative intensities of the peaks obtained for the competitive studies involving the formation of the supramolecular adducts **[1·X]**. Relative intensities measured as follows:  $R = I_X / I_{Cl^-}$ , where X = Cl, Br, or I. Competition experiment conditions: equimolar mixture of **1** : **TBACl** : **TBABr** : **TBAI** (1 mM each) in benzene.

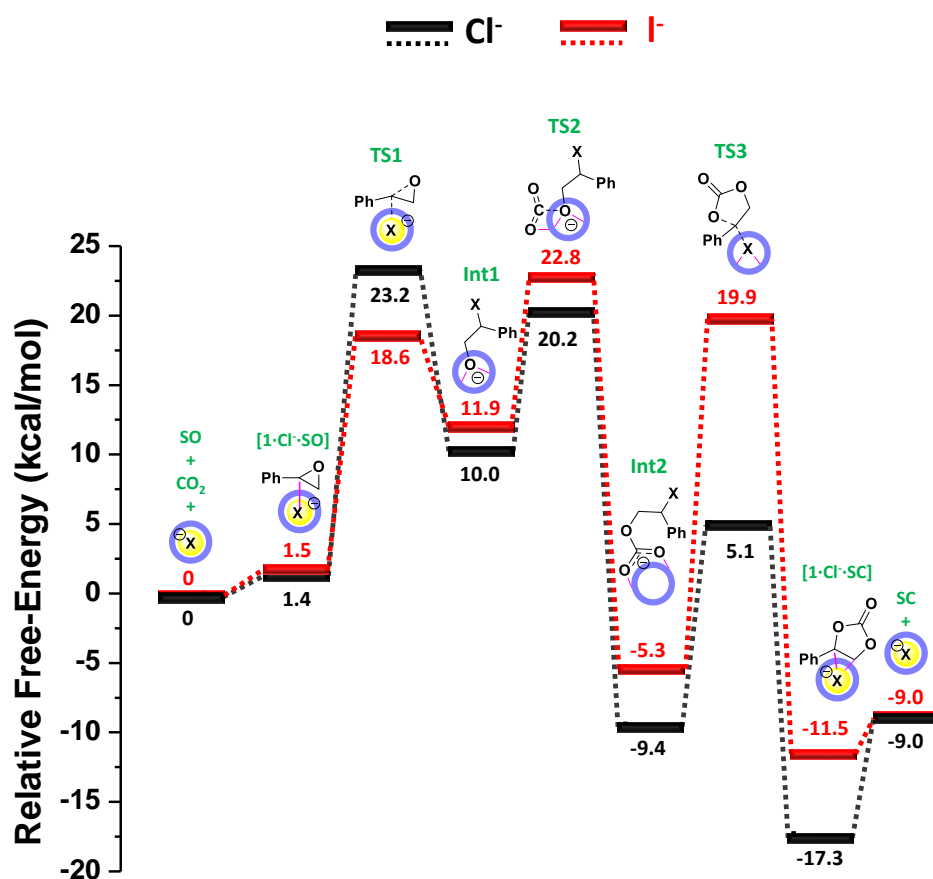

**Fig. S5.** Free-energy profiles for the cycloaddition of CO<sub>2</sub> to SO catalysed by **1** in the presence of chloride (black profile) and iodide (red profile) anion. The halide anion has been represented with a yellow sphere, and the macrocyclic scaffold with a blue circle. Hydrogen bonds have been highlighted with discontinuous magenta lines

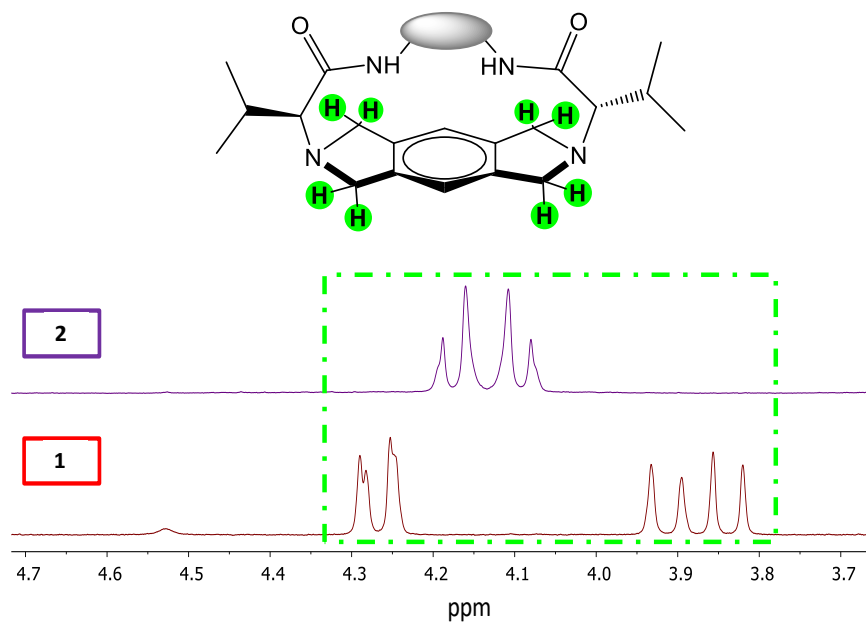

**Fig. S6.** Partial  $^1\text{H}$  NMR (400 MHz,  $\text{CD}_3\text{OD}$ , 25  $^\circ\text{C}$ ) spectra (signals for the isoindolinic protons, highlighted in green) of the macrocyclic pseudopeptides **1** and **2**. Concentration: 6 mM.

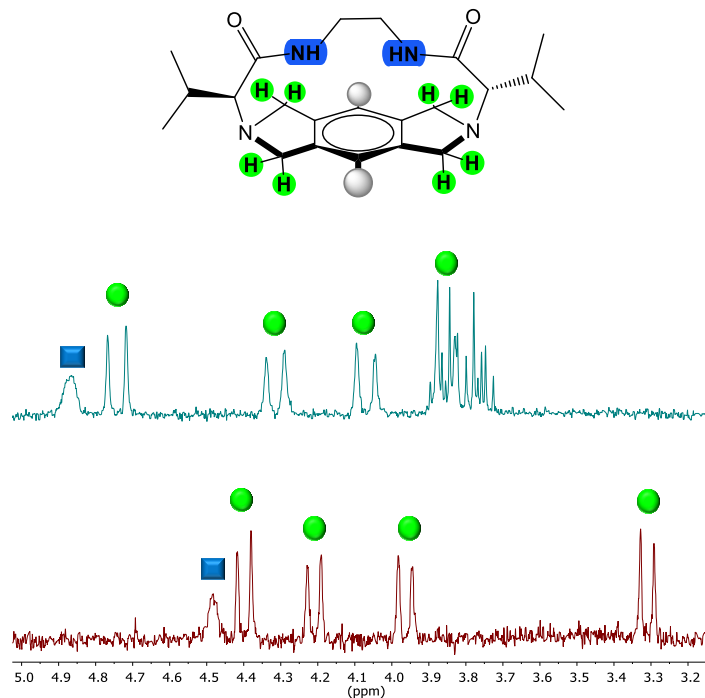

**Fig. S7.** Partial  $^1\text{H}$  NMR (400 MHz, 2 mM in benzene- $d_6$ , 25  $^\circ\text{C}$ ) spectra for the isoindolinic and amide group protons, highlighted in green and blue, respectively. Blue spectrum for **3** and red spectrum for **1**.

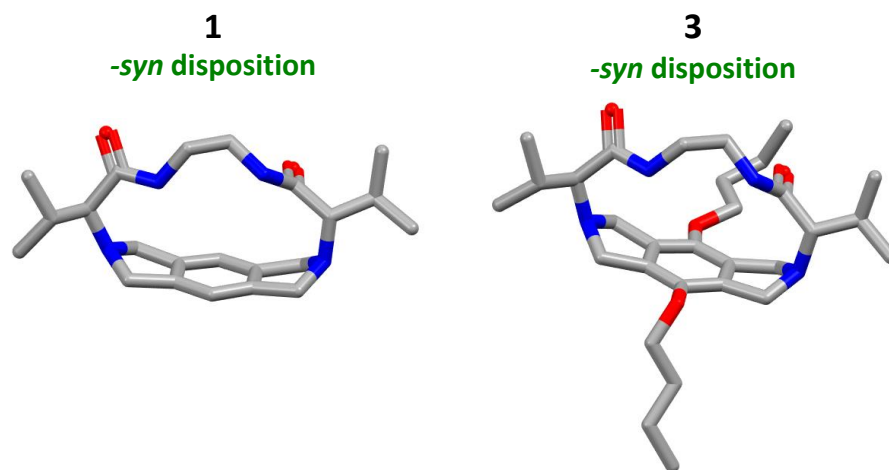

**Fig. S8.** DFT (B3LYP) optimized structures for the pseudopeptidic macrocycles **1** and **3**, both displaying -syn disposition for the amide groups.

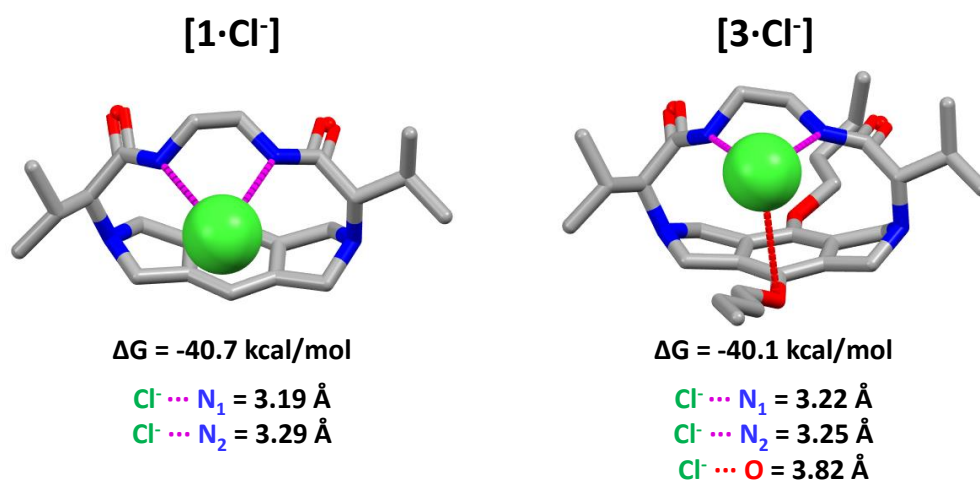

**Fig. S9.** DFT (B3LYP) optimized structures for the supramolecular complexes **[1·Cl<sup>-</sup>]** and **[3·Cl<sup>-</sup>]**. The free-energies of formation have been included, as well as the most relevant distances: stabilizing hydrogen bonding (discontinuous magenta lines) and repulsive polar interactions (discontinuous red lines).

## DFT calculation details

- Lowest energy conformation for Cl<sup>•</sup>.

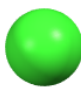

Cartesian coordinates (1 atom), E (298.15 K) = -15.013656 Hartree

|   |    |         |        |   |
|---|----|---------|--------|---|
| 1 | Cl | -2.1823 | 1.7893 | 0 |
|---|----|---------|--------|---|

- Lowest energy conformation for Br<sup>•</sup>.

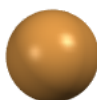

Cartesian coordinates (1 atom), E (298.15 K) = -13.253291 Hartree

|   |    |        |         |        |
|---|----|--------|---------|--------|
| 1 | Br | 1.1838 | -0.9904 | 2.8477 |
|---|----|--------|---------|--------|

- Lowest energy conformation for I<sup>•</sup>.

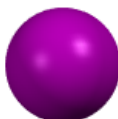

Cartesian coordinates (1 atom), E (298.15 K) = -11.488958 Hartree

|   |   |        |         |        |
|---|---|--------|---------|--------|
| 1 | I | 1.1838 | -0.9904 | 2.8477 |
|---|---|--------|---------|--------|

- Lowest energy conformation for CO<sub>2</sub>

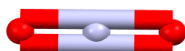

Cartesian coordinates (3 atoms), E (298.15 K) = -188.549993 Hartree

|   |   |        |        |         |
|---|---|--------|--------|---------|
| 1 | C | 4.3494 | 3.3158 | -0.1139 |
| 2 | O | 5.6078 | 3.3158 | -0.1139 |
| 3 | O | 3.091  | 3.3158 | -0.1139 |

- Lowest energy conformation for SO

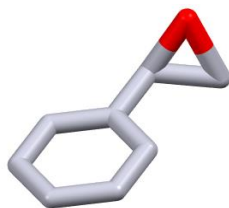

Cartesian coordinates (17 atoms). E (298.15 K) = -384.674236 Hartree

|    |   |         |         |         |
|----|---|---------|---------|---------|
| 1  | C | -3.1287 | 0.2627  | 0.0542  |
| 2  | C | -1.7335 | 0.2627  | 0.0542  |
| 3  | C | -1.036  | 1.4704  | 0.0542  |
| 4  | C | -1.7336 | 2.6789  | 0.053   |
| 5  | C | -3.1285 | 2.6789  | 0.0525  |
| 6  | C | -3.8261 | 1.4707  | 0.0535  |
| 7  | H | -3.6784 | -0.6896 | 0.0547  |
| 8  | H | -1.184  | -0.6898 | 0.0555  |
| 9  | H | 0.0637  | 1.4705  | 0.0549  |
| 10 | H | -3.6786 | 3.6311  | 0.0516  |
| 11 | H | -4.9257 | 1.4708  | 0.0534  |
| 12 | O | 0.0424  | 4.3695  | 1.1823  |
| 13 | C | -0.9631 | 4.0123  | 0.0529  |
| 14 | H | -1.8223 | 4.529   | -0.321  |
| 15 | C | 0.5285  | 3.9502  | -0.3249 |
| 16 | H | 0.4734  | 4.2162  | -1.3599 |
| 17 | H | 1.4644  | 3.4699  | -0.1295 |

- Lowest energy conformation for SC

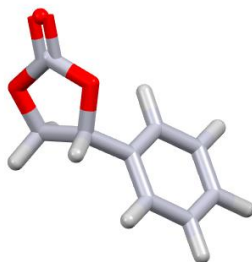

Cartesian coordinates (20 atoms). E (298.15 K) = -573.23857 Hartree

|    |   |         |         |         |
|----|---|---------|---------|---------|
| 1  | C | -3.0682 | 0.8196  | -0.6341 |
| 2  | C | -1.6633 | 0.7593  | -0.6966 |
| 3  | C | -0.8809 | 1.8007  | -0.1588 |
| 4  | C | -1.5172 | 2.9176  | 0.4267  |
| 5  | C | -2.9197 | 2.9834  | 0.4787  |
| 6  | C | -3.6992 | 1.9315  | -0.0465 |
| 7  | H | -3.6636 | 0.0099  | -1.0471 |
| 8  | H | -1.1798 | -0.0959 | -1.1656 |
| 9  | H | -0.9206 | 3.7418  | 0.8076  |
| 10 | H | -3.4046 | 3.8497  | 0.9177  |
| 11 | H | -4.7841 | 1.9826  | -0.004  |
| 12 | C | 0.6229  | 1.6869  | -0.182  |
| 13 | H | 0.9411  | 0.9214  | -0.8971 |



|    |   |        |        |         |
|----|---|--------|--------|---------|
| 14 | O | 1.2545 | 2.968  | -0.6131 |
| 15 | O | 2.537  | 2.2427 | 1.1333  |
| 16 | C | 2.428  | 3.1974 | 0.1155  |
| 17 | O | 3.2299 | 4.0883 | -0.097  |
| 18 | C | 1.2872 | 1.4555 | 1.206   |
| 19 | H | 1.5538 | 0.4122 | 1.3847  |
| 20 | H | 0.6804 | 1.8435 | 2.028   |

- Lowest energy conformation for 1.

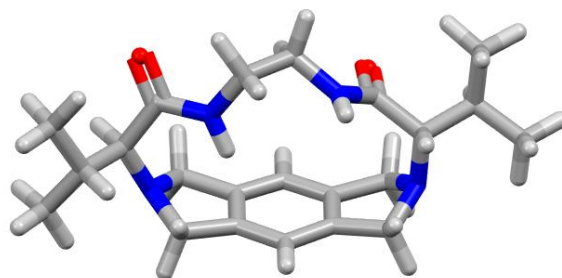

Cartesian coordinates (60 atoms), E (298.15 K) = -1226.405178 Hartree

|    |   |         |         |         |
|----|---|---------|---------|---------|
| 1  | H | -0.3201 | 1.1987  | 2.8274  |
| 2  | C | -0.6832 | 1.3629  | 1.8145  |
| 3  | C | -1.6241 | 1.7712  | -0.8643 |
| 4  | C | -1.8921 | 0.8075  | 1.3731  |
| 5  | C | 0.0823  | 2.0759  | 0.8743  |
| 6  | C | -0.3711 | 2.2545  | -0.4504 |
| 7  | C | -2.3693 | 1.0269  | 0.061   |
| 8  | H | -1.9662 | 1.8965  | -1.8887 |
| 9  | C | 1.4957  | 2.6363  | 1.0043  |
| 10 | H | 1.4878  | 3.6092  | 1.5231  |
| 11 | H | 2.1634  | 1.9792  | 1.5744  |
| 12 | C | 0.7385  | 2.8856  | -1.2835 |
| 13 | H | 0.5118  | 3.9346  | -1.5338 |
| 14 | C | -2.8258 | -0.1876 | 2.0578  |
| 15 | H | -2.3091 | -0.9204 | 2.6879  |
| 16 | H | -3.564  | 0.3281  | 2.6912  |
| 17 | C | -3.653  | 0.217   | -0.1284 |
| 18 | H | -3.7536 | -0.2134 | -1.1262 |
| 19 | H | -4.5409 | 0.8305  | 0.0843  |
| 20 | N | -3.5452 | -0.8536 | 0.9227  |
| 21 | C | -2.9592 | -2.1581 | 0.4657  |
| 22 | H | -2.5114 | -2.6244 | 1.357   |
| 23 | C | -1.858  | -2.0036 | -0.6239 |
| 24 | N | -0.5454 | -2.1363 | -0.2228 |
| 25 | C | 0.5714  | -2.1155 | -1.1899 |
| 26 | H | 0.7274  | -3.1313 | -1.5858 |
| 27 | H | 0.2701  | -1.4854 | -2.0308 |
| 28 | C | 1.9033  | -1.6242 | -0.5876 |
| 29 | H | 2.7157  | -1.9418 | -1.2483 |
| 30 | H | 2.0685  | -2.0993 | 0.3933  |
| 31 | N | 2.0365  | -0.1668 | -0.4519 |
| 32 | C | 2.9582  | 0.5454  | -1.198  |
| 33 | C | 3.1236  | 2.0771  | -0.925  |
| 34 | H | 3.3438  | 2.4912  | -1.9187 |
| 35 | N | 1.941   | 2.7894  | -0.4088 |
| 36 | H | 0.8981  | 2.3518  | -2.2302 |

|    |   |         |         |         |
|----|---|---------|---------|---------|
| 37 | C | 4.3928  | 2.3657  | -0.0459 |
| 38 | H | 4.2075  | 1.969   | 0.9651  |
| 39 | C | 5.6733  | 1.688   | -0.586  |
| 40 | H | 6.5277  | 1.9711  | 0.0436  |
| 41 | H | 5.599   | 0.5971  | -0.6001 |
| 42 | H | 5.8836  | 2.0107  | -1.6138 |
| 43 | C | 4.6168  | 3.8926  | 0.0661  |
| 44 | H | 4.8497  | 4.3176  | -0.9206 |
| 45 | H | 3.7308  | 4.4073  | 0.4493  |
| 46 | H | 5.4652  | 4.1038  | 0.7305  |
| 47 | C | -4.0731 | -3.118  | -0.0501 |
| 48 | H | -4.5326 | -2.6377 | -0.9258 |
| 49 | C | -3.4821 | -4.4751 | -0.5007 |
| 50 | H | -2.783  | -4.3613 | -1.3369 |
| 51 | H | -2.9591 | -4.9732 | 0.33    |
| 52 | H | -4.2865 | -5.1453 | -0.83   |
| 53 | C | -5.1541 | -3.331  | 1.03    |
| 54 | H | -5.5396 | -2.3709 | 1.3859  |
| 55 | H | -5.9876 | -3.9209 | 0.6261  |
| 56 | H | -4.7457 | -3.8793 | 1.8927  |
| 57 | O | -2.1538 | -1.7659 | -1.8285 |
| 58 | O | 3.6806  | -0.0207 | -2.0643 |
| 59 | H | -0.3474 | -2.3913 | 0.7383  |
| 60 | H | 1.3674  | 0.3269  | 0.1271  |

- Lowest energy conformation for [1·Cl].

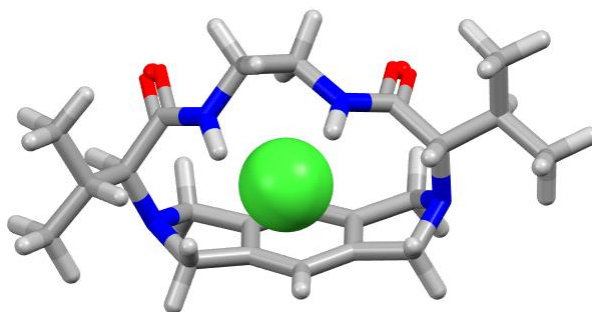

Cartesian coordinates (61 atoms), E (298.15 K) = -1241.483633 Hartree

|    |   |         |         |         |
|----|---|---------|---------|---------|
| 1  | H | -0.546  | 1.3861  | 2.7269  |
| 2  | C | -0.8705 | 1.57    | 1.7084  |
| 3  | C | -1.5963 | 1.8349  | -1.0541 |
| 4  | C | -2.0374 | 0.9919  | 1.2036  |
| 5  | C | -0.0432 | 2.2417  | 0.7975  |
| 6  | C | -0.3968 | 2.3836  | -0.557  |
| 7  | C | -2.3964 | 1.1074  | -0.1577 |
| 8  | H | -1.8453 | 1.8918  | -2.1119 |
| 9  | C | 1.3791  | 2.7143  | 1.0209  |
| 10 | H | 1.4165  | 3.6485  | 1.6071  |
| 11 | H | 1.9471  | 1.9601  | 1.5778  |
| 12 | C | 0.7593  | 3.043   | -1.3029 |
| 13 | H | 0.539   | 4.0989  | -1.5341 |
| 14 | C | -2.9734 | -0.0021 | 1.8743  |
| 15 | H | -2.4601 | -0.6479 | 2.5935  |
| 16 | H | -3.7988 | 0.5058  | 2.4005  |
| 17 | C | -3.6032 | 0.1946  | -0.4051 |
| 18 | H | -3.5838 | -0.3154 | -1.3707 |
| 19 | H | -4.5487 | 0.7545  | -0.3247 |
| 20 | N | -3.5421 | -0.7945 | 0.7315  |
| 21 | C | -2.8146 | -2.0913 | 0.4633  |
| 22 | H | -2.2404 | -2.3263 | 1.3703  |
| 23 | C | -1.8202 | -2.0155 | -0.7254 |
| 24 | N | -0.5034 | -1.8315 | -0.4429 |
| 25 | C | 0.4629  | -1.7256 | -1.5515 |
| 26 | H | 0.3773  | -2.6265 | -2.1762 |
| 27 | H | 0.2027  | -0.8761 | -2.1958 |
| 28 | C | 1.9154  | -1.5804 | -1.0597 |
| 29 | H | 2.5768  | -1.7997 | -1.9042 |
| 30 | H | 2.1066  | -2.2857 | -0.2435 |
| 31 | N | 2.2495  | -0.2361 | -0.5632 |
| 32 | C | 2.7084  | 0.7305  | -1.408  |
| 33 | C | 3.0682  | 2.1416  | -0.8472 |
| 34 | H | 3.443   | 2.6579  | -1.7427 |
| 35 | N | 1.9199  | 2.9475  | -0.3551 |
| 36 | H | 0.99    | 2.5406  | -2.2508 |

|    |   |         |         |         |
|----|---|---------|---------|---------|
| 37 | C | 4.2517  | 2.0859  | 0.1629  |
| 38 | H | 3.9359  | 1.5276  | 1.056   |
| 39 | C | 5.4545  | 1.3322  | -0.4532 |
| 40 | H | 6.2915  | 1.3091  | 0.2583  |
| 41 | H | 5.1973  | 0.2981  | -0.7087 |
| 42 | H | 5.7978  | 1.8298  | -1.3712 |
| 43 | C | 4.6772  | 3.5073  | 0.5964  |
| 44 | H | 5.0297  | 4.0829  | -0.272  |
| 45 | H | 3.8423  | 4.0574  | 1.0408  |
| 46 | H | 5.497   | 3.457   | 1.3273  |
| 47 | C | -3.8286 | -3.2497 | 0.2268  |
| 48 | H | -4.388  | -3.0009 | -0.6863 |
| 49 | C | -3.1009 | -4.5959 | -0.0032 |
| 50 | H | -2.4746 | -4.5614 | -0.901  |
| 51 | H | -2.4626 | -4.8485 | 0.857   |
| 52 | H | -3.8305 | -5.4088 | -0.1282 |
| 53 | C | -4.8164 | -3.365  | 1.407   |
| 54 | H | -5.2935 | -2.398  | 1.5966  |
| 55 | H | -5.5939 | -4.1125 | 1.1911  |
| 56 | H | -4.2956 | -3.6793 | 2.3251  |
| 57 | O | -2.2407 | -2.1293 | -1.925  |
| 58 | O | 2.8706  | 0.5156  | -2.654  |
| 59 | H | -0.1568 | -1.6576 | 0.5176  |
| 60 | H | 2.0529  | -0.0999 | 0.439   |
| 61 | C | 1.1427  | -1.0868 | 2.309   |

- Lowest energy conformation for [1-Br].

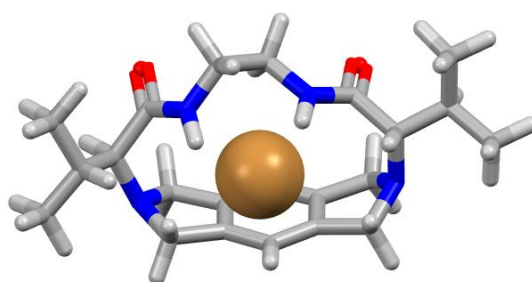

Cartesian coordinates (61 atoms), E (298.15 K) = -1239.707715 Hartree

|    |   |         |         |         |
|----|---|---------|---------|---------|
| 1  | H | -0.4964 | 1.3649  | 2.7267  |
| 2  | C | -0.8299 | 1.5497  | 1.7109  |
| 3  | C | -1.5855 | 1.827   | -1.043  |
| 4  | C | -1.9952 | 0.9609  | 1.2121  |
| 5  | C | -0.0206 | 2.2401  | 0.7976  |
| 6  | C | -0.3879 | 2.3852  | -0.5536 |
| 7  | C | -2.3705 | 1.0859  | -0.1437 |
| 8  | H | -1.8476 | 1.8923  | -2.0971 |
| 9  | C | 1.3886  | 2.7576  | 1.0127  |
| 10 | H | 1.394   | 3.7041  | 1.5796  |
| 11 | H | 1.9873  | 2.0388  | 1.5835  |
| 12 | C | 0.7493  | 3.0761  | -1.3016 |
| 13 | H | 0.5091  | 4.1323  | -1.5088 |
| 14 | C | -2.923  | -0.0366 | 1.889   |
| 15 | H | -2.3983 | -0.6925 | 2.5909  |
| 16 | H | -3.7329 | 0.4708  | 2.4389  |
| 17 | C | -3.5841 | 0.1805  | -0.3833 |
| 18 | H | -3.5751 | -0.3264 | -1.3509 |
| 19 | H | -4.5246 | 0.7475  | -0.2954 |
| 20 | N | -3.5202 | -0.812  | 0.7495  |
| 21 | C | -2.8279 | -2.1218 | 0.4624  |
| 22 | H | -2.2754 | -2.3922 | 1.3731  |
| 23 | C | -1.8139 | -2.0413 | -0.7096 |
| 24 | N | -0.499  | -1.8675 | -0.4042 |
| 25 | C | 0.4872  | -1.7451 | -1.4937 |
| 26 | H | 0.4293  | -2.6479 | -2.1188 |
| 27 | H | 0.2225  | -0.9017 | -2.1428 |
| 28 | C | 1.9288  | -1.5759 | -0.9783 |
| 29 | H | 2.6053  | -1.8165 | -1.8052 |
| 30 | H | 2.1133  | -2.2562 | -0.1395 |
| 31 | N | 2.254   | -0.217  | -0.5157 |
| 32 | C | 2.6741  | 0.742   | -1.3917 |
| 33 | C | 3.0556  | 2.1598  | -0.864  |
| 34 | H | 3.4168  | 2.657   | -1.7753 |
| 35 | N | 1.9223  | 2.9859  | -0.3675 |
| 36 | H | 0.9793  | 2.5958  | -2.2606 |
| 37 | C | 4.2572  | 2.1128  | 0.1252  |

|    |    |         |         |         |
|----|----|---------|---------|---------|
| 38 | H  | 3.9585  | 1.5656  | 1.0311  |
| 39 | C  | 5.446   | 1.3489  | -0.5054 |
| 40 | H  | 6.2951  | 1.3287  | 0.1913  |
| 41 | H  | 5.1815  | 0.3131  | -0.7468 |
| 42 | H  | 5.7751  | 1.8374  | -1.4335 |
| 43 | C  | 4.694   | 3.5375  | 0.5351  |
| 44 | H  | 5.0287  | 4.1043  | -0.346  |
| 45 | H  | 3.8699  | 4.0936  | 0.992   |
| 46 | H  | 5.5291  | 3.4922  | 1.2488  |
| 47 | C  | -3.8691 | -3.2464 | 0.1859  |
| 48 | H  | -4.4109 | -2.9628 | -0.7277 |
| 49 | C  | -3.1751 | -4.6064 | -0.0661 |
| 50 | H  | -2.5344 | -4.5686 | -0.9536 |
| 51 | H  | -2.5581 | -4.8978 | 0.7973  |
| 52 | H  | -3.925  | -5.395  | -0.2218 |
| 53 | C  | -4.8735 | -3.3614 | 1.352   |
| 54 | H  | -5.3267 | -2.3867 | 1.5593  |
| 55 | H  | -5.6679 | -4.0827 | 1.1106  |
| 56 | H  | -4.3716 | -3.71   | 2.2681  |
| 57 | O  | -2.2122 | -2.1318 | -1.9172 |
| 58 | O  | 2.7819  | 0.508   | -2.6387 |
| 59 | H  | -0.1751 | -1.7327 | 0.564   |
| 60 | H  | 2.117   | -0.0568 | 0.4879  |
| 61 | Br | 1.2567  | -1.2064 | 2.6258  |

- Lowest energy conformation for [1-1].

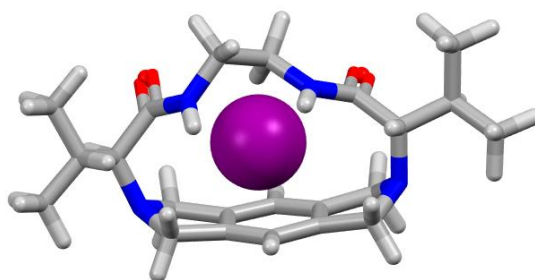

Cartesian coordinates (61 atoms), E (298.15 K) = -1237.929922 Hartree

|    |   |         |         |         |
|----|---|---------|---------|---------|
| 1  | H | -0.4692 | 1.366   | 2.735   |
| 2  | C | -0.8047 | 1.5421  | 1.7178  |
| 3  | C | -1.5825 | 1.828   | -1.029  |
| 4  | C | -1.9689 | 0.9451  | 1.2239  |
| 5  | C | -0.0058 | 2.2414  | 0.8016  |
| 6  | C | -0.3843 | 2.3899  | -0.5466 |
| 7  | C | -2.3564 | 1.0777  | -0.1277 |
| 8  | H | -1.8557 | 1.9011  | -2.0798 |
| 9  | C | 1.3959  | 2.785   | 1.0083  |
| 10 | H | 1.3839  | 3.7377  | 1.5639  |
| 11 | H | 2.014   | 2.0879  | 1.5849  |
| 12 | C | 0.7386  | 3.102   | -1.2969 |
| 13 | H | 0.4861  | 4.1591  | -1.4832 |
| 14 | C | -2.8932 | -0.0539 | 1.9044  |
| 15 | H | -2.365  | -0.7178 | 2.5964  |
| 16 | H | -3.6928 | 0.4543  | 2.4683  |
| 17 | C | -3.5766 | 0.1799  | -0.3608 |
| 18 | H | -3.5785 | -0.3221 | -1.3309 |
| 19 | H | -4.5125 | 0.7528  | -0.2626 |
| 20 | N | -3.5086 | -0.8174 | 0.7669  |
| 21 | C | -2.8367 | -2.1332 | 0.4641  |
| 22 | H | -2.2988 | -2.4282 | 1.3761  |
| 23 | C | -1.811  | -2.0463 | -0.6972 |
| 24 | N | -0.4944 | -1.8952 | -0.3788 |
| 25 | C | 0.5018  | -1.7602 | -1.4582 |
| 26 | H | 0.4604  | -2.6627 | -2.0852 |
| 27 | H | 0.2316  | -0.9199 | -2.1078 |
| 28 | C | 1.938   | -1.5765 | -0.9338 |
| 29 | H | 2.6197  | -1.8285 | -1.7536 |
| 30 | H | 2.1247  | -2.2454 | -0.086  |
| 31 | N | 2.2608  | -0.2106 | -0.4899 |
| 32 | C | 2.6366  | 0.7498  | -1.3868 |
| 33 | C | 3.0412  | 2.1682  | -0.8795 |
| 34 | H | 3.3911  | 2.6532  | -1.8015 |
| 35 | N | 1.922   | 3.0107  | -0.3756 |
| 36 | H | 0.9642  | 2.6394  | -2.2652 |



|    |   |         |         |         |
|----|---|---------|---------|---------|
| 37 | C | 4.2578  | 2.1218  | 0.091   |
| 38 | H | 3.9717  | 1.5863  | 1.0082  |
| 39 | C | 5.4305  | 1.343   | -0.5518 |
| 40 | H | 6.2911  | 1.3245  | 0.1305  |
| 41 | H | 5.1561  | 0.306   | -0.7766 |
| 42 | H | 5.7471  | 1.8196  | -1.4904 |
| 43 | C | 4.7111  | 3.5471  | 0.4802  |
| 44 | H | 5.0373  | 4.1028  | -0.4111 |
| 45 | H | 3.8979  | 4.1138  | 0.9435  |
| 46 | H | 5.5558  | 3.5019  | 1.1822  |
| 47 | C | -3.8929 | -3.2359 | 0.1582  |
| 48 | H | -4.423  | -2.9274 | -0.7544 |
| 49 | C | -3.2181 | -4.6018 | -0.1136 |
| 50 | H | -2.5662 | -4.5576 | -0.9925 |
| 51 | H | -2.6172 | -4.9215 | 0.751   |
| 52 | H | -3.9792 | -5.374  | -0.2945 |
| 53 | C | -4.9082 | -3.3564 | 1.3141  |
| 54 | H | -5.35   | -2.3795 | 1.5349  |
| 55 | H | -5.7101 | -4.0626 | 1.054   |
| 56 | H | -4.4186 | -3.7273 | 2.228   |
| 57 | O | -2.1971 | -2.1054 | -1.9093 |
| 58 | O | 2.6819  | 0.5113  | -2.6356 |
| 59 | H | -0.1812 | -1.8052 | 0.5935  |
| 60 | H | 2.1897  | -0.0405 | 0.5157  |
| 61 | I | 1.419   | -1.3362 | 2.9499  |

- Lowest energy conformation for [1-Int2].

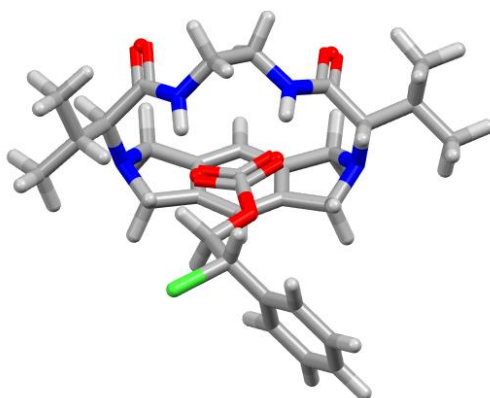

Cartesian coordinates (81 atoms), E (298.15 K) = -2279.366513 Hartree

|    |   |         |         |         |
|----|---|---------|---------|---------|
| 1  | H | 0.0281  | 1.122   | 3.0273  |
| 2  | C | -0.4438 | 1.3097  | 2.0665  |
| 3  | C | -1.611  | 1.6842  | -0.5221 |
| 4  | C | -1.645  | 0.6856  | 1.7152  |
| 5  | C | 0.1941  | 2.0832  | 1.0865  |
| 6  | C | -0.3749 | 2.2696  | -0.1885 |
| 7  | C | -2.2269 | 0.8685  | 0.4417  |
| 8  | H | -2.0333 | 1.7906  | -1.5193 |
| 9  | C | 1.5856  | 2.6885  | 1.1231  |
| 10 | H | 1.5992  | 3.6305  | 1.6976  |
| 11 | H | 2.3015  | 2.0068  | 1.5903  |
| 12 | C | 0.6111  | 3.0474  | -1.0577 |
| 13 | H | 0.3013  | 4.0999  | -1.1686 |
| 14 | C | -2.4284 | -0.3819 | 2.4669  |
| 15 | H | -1.7783 | -1.0716 | 3.0144  |
| 16 | H | -3.1353 | 0.0661  | 3.1852  |
| 17 | C | -3.446  | -0.0536 | 0.3376  |
| 18 | H | -3.5657 | -0.5147 | -0.6458 |
| 19 | H | -4.3727 | 0.4892  | 0.584   |
| 20 | N | -3.2    | -1.0955 | 1.3957  |
| 21 | C | -2.5775 | -2.3874 | 0.9306  |
| 22 | H | -1.9272 | -2.7315 | 1.7459  |
| 23 | C | -1.7052 | -2.2179 | -0.3438 |
| 24 | N | -0.3703 | -2.0361 | -0.1677 |
| 25 | C | 0.4928  | -1.8241 | -1.3425 |
| 26 | H | 0.4156  | -2.7035 | -1.9995 |
| 27 | H | 0.1308  | -0.9728 | -1.9298 |
| 28 | C | 1.9734  | -1.6063 | -0.9707 |
| 29 | H | 2.5671  | -1.8363 | -1.8636 |
| 30 | H | 2.2636  | -2.2917 | -0.1658 |
| 31 | N | 2.3193  | -0.242  | -0.5388 |
| 32 | C | 2.5215  | 0.7413  | -1.4608 |
| 33 | C | 2.9671  | 2.1584  | -0.9839 |
| 34 | H | 3.1798  | 2.6716  | -1.9323 |

|    |    |         |         |         |
|----|----|---------|---------|---------|
| 35 | N  | 1.9125  | 2.9698  | -0.3113 |
| 36 | H  | 0.7161  | 2.6229  | -2.0632 |
| 37 | C  | 4.3027  | 2.1149  | -0.184  |
| 38 | H  | 4.1503  | 1.5403  | 0.7407  |
| 39 | C  | 5.3964  | 1.3906  | -1.0047 |
| 40 | H  | 6.3374  | 1.3604  | -0.4384 |
| 41 | H  | 5.11    | 0.3593  | -1.2405 |
| 42 | H  | 5.5845  | 1.9138  | -1.9533 |
| 43 | C  | 4.773   | 3.5385  | 0.1911  |
| 44 | H  | 4.9521  | 4.1354  | -0.7154 |
| 45 | H  | 4.0218  | 4.0642  | 0.788   |
| 46 | H  | 5.7117  | 3.4948  | 0.7619  |
| 47 | C  | -3.666  | -3.4737 | 0.6947  |
| 48 | H  | -4.2992 | -3.1214 | -0.1324 |
| 49 | C  | -3.0304 | -4.8199 | 0.2718  |
| 50 | H  | -2.4876 | -4.7226 | -0.6743 |
| 51 | H  | -2.3308 | -5.1814 | 1.0406  |
| 52 | H  | -3.808  | -5.586  | 0.1412  |
| 53 | C  | -4.5395 | -3.6612 | 1.9533  |
| 54 | H  | -4.9519 | -2.6998 | 2.2759  |
| 55 | H  | -5.3666 | -4.3578 | 1.7518  |
| 56 | H  | -3.9465 | -4.0757 | 2.7833  |
| 57 | O  | -2.2394 | -2.2344 | -1.5023 |
| 58 | O  | 2.3766  | 0.5356  | -2.7102 |
| 59 | H  | 0.0507  | -1.9844 | 0.7753  |
| 60 | H  | 2.4256  | -0.0993 | 0.4793  |
| 61 | C  | 2.6534  | -2.6694 | 8.0807  |
| 62 | C  | 2.6204  | -1.5983 | 7.1601  |
| 63 | C  | 1.6285  | -0.6052 | 7.3087  |
| 64 | C  | 0.6968  | -0.6791 | 8.3587  |
| 65 | C  | 0.7419  | -1.7472 | 9.2757  |
| 66 | C  | 1.7242  | -2.7464 | 9.1318  |
| 67 | H  | 3.4111  | -3.4431 | 7.9704  |
| 68 | H  | 1.5701  | 0.2137  | 6.5985  |
| 69 | H  | -0.0681 | 0.088   | 8.4559  |
| 70 | H  | 0.0169  | -1.8044 | 10.0848 |
| 71 | H  | 1.761   | -3.5801 | 9.8296  |
| 72 | Cl | 5.2559  | -0.6773 | 6.7456  |
| 73 | C  | 3.6439  | -1.5525 | 6.0576  |
| 74 | H  | 4.0201  | -2.5493 | 5.8238  |
| 75 | C  | 3.2985  | -0.7992 | 4.7743  |
| 76 | H  | 3.0362  | 0.2477  | 4.9717  |
| 77 | H  | 4.1488  | -0.8033 | 4.0866  |
| 78 | O  | 2.1682  | -1.5231 | 4.1995  |
| 79 | C  | 1.8577  | -1.232  | 2.8156  |
| 80 | O  | 0.8861  | -1.9087 | 2.36    |
| 81 | O  | 2.5929  | -0.3413 | 2.2502  |

- Lowest energy conformation for [1-Int1].

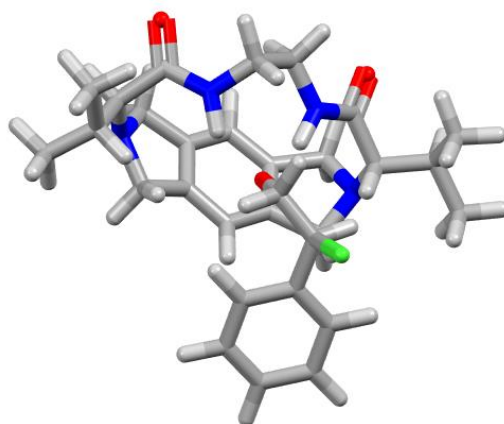

Cartesian coordinates (78 atoms), E (298.15 K) = -1626.141858 Hartree

|    |   |         |         |         |
|----|---|---------|---------|---------|
| 1  | H | -0.6591 | 1.4977  | 2.8266  |
| 2  | C | -0.951  | 1.5831  | 1.7844  |
| 3  | C | -1.6118 | 1.6186  | -1.0054 |
| 4  | C | -2.1053 | 0.9631  | 1.3036  |
| 5  | C | -0.0998 | 2.1758  | 0.8401  |
| 6  | C | -0.4284 | 2.2166  | -0.5266 |
| 7  | C | -2.4239 | 0.9543  | -0.0741 |
| 8  | H | -1.8348 | 1.5874  | -2.0701 |
| 9  | C | 1.3245  | 2.6447  | 1.0527  |
| 10 | H | 1.3723  | 3.5936  | 1.6149  |
| 11 | H | 1.877   | 1.8943  | 1.6301  |
| 12 | C | 0.7361  | 2.8187  | -1.3029 |
| 13 | H | 0.5101  | 3.8437  | -1.6426 |
| 14 | C | -3.0658 | 0.0244  | 2.0218  |
| 15 | H | -2.6081 | -0.5178 | 2.8543  |
| 16 | H | -3.9439 | 0.5646  | 2.4125  |
| 17 | C | -3.5906 | -0.0198 | -0.2776 |
| 18 | H | -3.5294 | -0.6041 | -1.1974 |
| 19 | H | -4.56   | 0.5032  | -0.2583 |
| 20 | N | -3.5216 | -0.9117 | 0.9377  |
| 21 | C | -2.648  | -2.1483 | 0.8261  |
| 22 | H | -2.004  | -2.1691 | 1.717   |
| 23 | C | -1.7257 | -2.1605 | -0.4191 |
| 24 | N | -0.4114 | -1.8714 | -0.2409 |
| 25 | C | 0.4653  | -1.8458 | -1.4263 |
| 26 | H | 0.3462  | -2.7907 | -1.9759 |
| 27 | H | 0.1484  | -1.0464 | -2.1113 |
| 28 | C | 1.9468  | -1.6503 | -1.0559 |
| 29 | H | 2.5521  | -1.8056 | -1.9542 |
| 30 | H | 2.2334  | -2.3878 | -0.2954 |
| 31 | N | 2.2496  | -0.3079 | -0.5312 |
| 32 | C | 2.8104  | 0.6419  | -1.3297 |
| 33 | C | 3.0787  | 2.0719  | -0.7617 |

|    |    |         |         |         |
|----|----|---------|---------|---------|
| 34 | H  | 3.473   | 2.5983  | -1.6432 |
| 35 | N  | 1.8733  | 2.8219  | -0.326  |
| 36 | H  | 0.9912  | 2.2293  | -2.1936 |
| 37 | C  | 4.2194  | 2.0754  | 0.2985  |
| 38 | H  | 3.8777  | 1.5319  | 1.1917  |
| 39 | C  | 5.4687  | 1.3396  | -0.2408 |
| 40 | H  | 6.2753  | 1.3667  | 0.5052  |
| 41 | H  | 5.2519  | 0.2911  | -0.4726 |
| 42 | H  | 5.8351  | 1.8149  | -1.1612 |
| 43 | C  | 4.5859  | 3.5199  | 0.7105  |
| 44 | H  | 4.9603  | 4.0806  | -0.1583 |
| 45 | H  | 3.7178  | 4.0586  | 1.1026  |
| 46 | H  | 5.3745  | 3.5142  | 1.4767  |
| 47 | C  | -3.5298 | -3.4321 | 0.8402  |
| 48 | H  | -4.1555 | -3.3916 | -0.0624 |
| 49 | C  | -2.6626 | -4.712  | 0.7748  |
| 50 | H  | -2.0794 | -4.7515 | -0.1515 |
| 51 | H  | -1.9659 | -4.76   | 1.6256  |
| 52 | H  | -3.2987 | -5.6078 | 0.815   |
| 53 | C  | -4.4424 | -3.4609 | 2.0843  |
| 54 | H  | -5.0264 | -2.5368 | 2.1459  |
| 55 | H  | -5.1317 | -4.3167 | 2.0412  |
| 56 | H  | -3.8473 | -3.5585 | 3.0064  |
| 57 | O  | -2.2107 | -2.4504 | -1.5663 |
| 58 | O  | 3.1392  | 0.4117  | -2.5411 |
| 59 | H  | 0.0157  | -1.5371 | 0.6732  |
| 60 | H  | 1.9151  | -0.1904 | 0.4531  |
| 61 | C  | -0.7945 | -1.3273 | 5.5599  |
| 62 | C  | 0.3605  | -1.0981 | 4.7785  |
| 63 | C  | 1.0292  | 0.1387  | 4.9076  |
| 64 | C  | 0.5619  | 1.1143  | 5.8062  |
| 65 | C  | -0.5858 | 0.8725  | 6.5875  |
| 66 | C  | -1.2661 | -0.3543 | 6.4588  |
| 67 | H  | -1.316  | -2.2784 | 5.4688  |
| 68 | H  | 1.8957  | 0.3411  | 4.2876  |
| 69 | H  | 1.085   | 2.0649  | 5.8905  |
| 70 | H  | -0.9479 | 1.6307  | 7.2792  |
| 71 | H  | -2.1574 | -0.549  | 7.0519  |
| 72 | Cl | 1.8133  | -3.5215 | 4.9616  |
| 73 | C  | 0.8505  | -2.1738 | 3.8429  |
| 74 | H  | 0.0283  | -2.7882 | 3.4696  |
| 75 | C  | 1.787   | -1.7688 | 2.6943  |
| 76 | H  | 2.6984  | -1.3011 | 3.1186  |
| 77 | H  | 2.123   | -2.7029 | 2.1995  |
| 78 | O  | 1.0613  | -0.8985 | 1.833   |

- Lowest energy conformation for [1-Cl-SO].

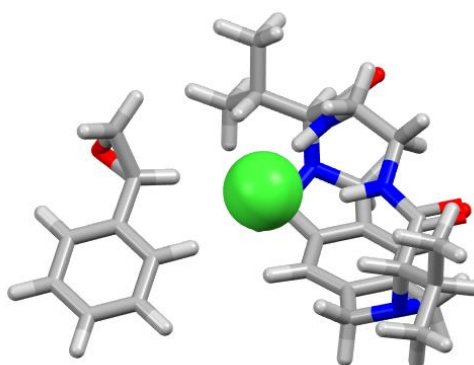

Cartesian coordinates (78 atoms), E (298.15 K) = -1626.155527 Hartree

|    |   |         |         |         |
|----|---|---------|---------|---------|
| 1  | H | -0.6131 | 1.7511  | 2.4093  |
| 2  | C | -0.8919 | 1.8009  | 1.3618  |
| 3  | C | -1.5171 | 1.7316  | -1.4636 |
| 4  | C | -2.0529 | 1.182   | 0.8905  |
| 5  | C | -0.0203 | 2.3409  | 0.406   |
| 6  | C | -0.3237 | 2.3157  | -0.9686 |
| 7  | C | -2.3642 | 1.1373  | -0.4863 |
| 8  | H | -1.7311 | 1.6638  | -2.501  |
| 9  | C | 1.396   | 2.8423  | 0.6163  |
| 10 | H | 1.4102  | 3.8553  | 1.0524  |
| 11 | H | 1.9474  | 2.1919  | 1.3043  |
| 12 | C | 0.8683  | 2.8649  | -1.7472 |
| 13 | H | 0.6751  | 3.8898  | -2.1056 |
| 14 | C | -3.0372 | 0.2997  | 1.6447  |
| 15 | H | -2.5606 | -0.2757 | 2.4448  |
| 16 | H | -3.8541 | 0.8905  | 2.091   |
| 17 | C | -3.5907 | 0.2363  | -0.6663 |
| 18 | H | -3.5496 | -0.3929 | -1.5584 |
| 19 | H | -4.5179 | 0.8301  | -0.7014 |
| 20 | N | -3.6063 | -0.6003 | 0.5866  |
| 21 | C | -2.9501 | -1.956  | 0.5039  |
| 22 | H | -2.4449 | -2.1211 | 1.4658  |
| 23 | C | -1.8864 | -2.0617 | -0.6221 |
| 24 | N | -0.5815 | -1.8777 | -0.2829 |
| 25 | C | 0.4567  | -1.9468 | -1.3279 |
| 26 | H | 0.4021  | -2.9341 | -1.8095 |
| 27 | H | 0.2504  | -1.2089 | -2.1126 |
| 28 | C | 1.8758  | -1.7332 | -0.7693 |
| 29 | H | 2.5849  | -2.092  | -1.5224 |
| 30 | H | 2.0035  | -2.2997 | 0.1595  |
| 31 | N | 2.2099  | -0.33   | -0.4752 |
| 32 | C | 2.7268  | 0.4872  | -1.4403 |
| 33 | C | 3.1228  | 1.9544  | -1.0845 |
| 34 | H | 3.541   | 2.3182  | -2.0335 |
| 35 | N | 1.9949  | 2.8659  | -0.7549 |

|    |    |         |         |         |
|----|----|---------|---------|---------|
| 36 | H  | 1.122   | 2.2523  | -2.6211 |
| 37 | C  | 4.2764  | 2.0084  | -0.0391 |
| 38 | H  | 3.9145  | 1.6077  | 0.9191  |
| 39 | C  | 5.4617  | 1.1232  | -0.4915 |
| 40 | H  | 6.2729  | 1.1738  | 0.2473  |
| 41 | H  | 5.1667  | 0.0734  | -0.6008 |
| 42 | H  | 5.8567  | 1.4637  | -1.4591 |
| 43 | C  | 4.7497  | 3.4619  | 0.1881  |
| 44 | H  | 5.1512  | 3.8846  | -0.7446 |
| 45 | H  | 3.9269  | 4.1046  | 0.5153  |
| 46 | H  | 5.5441  | 3.4917  | 0.9469  |
| 47 | C  | -4.0193 | -3.075  | 0.3312  |
| 48 | H  | -4.508  | -2.9024 | -0.6384 |
| 49 | C  | -3.3662 | -4.4774 | 0.3004  |
| 50 | H  | -2.6882 | -4.5827 | -0.5532 |
| 51 | H  | -2.7973 | -4.6656 | 1.2236  |
| 52 | H  | -4.1377 | -5.2563 | 0.2201  |
| 53 | C  | -5.0796 | -2.9979 | 1.4498  |
| 54 | H  | -5.5043 | -1.9901 | 1.4993  |
| 55 | H  | -5.8886 | -3.7204 | 1.2681  |
| 56 | H  | -4.6348 | -3.233  | 2.4295  |
| 57 | O  | -2.237  | -2.3115 | -1.8219 |
| 58 | O  | 2.9193  | 0.0769  | -2.6298 |
| 59 | H  | -0.2923 | -1.607  | 0.6685  |
| 60 | H  | 1.9924  | -0.0272 | 0.4786  |
| 61 | Cl | 0.9747  | -0.8959 | 2.4922  |
| 62 | C  | 0.6851  | -0.2263 | 6.0735  |
| 63 | C  | 2.0304  | 0.1131  | 6.3469  |
| 64 | C  | 2.3894  | 0.5537  | 7.64    |
| 65 | C  | 1.419   | 0.6382  | 8.6551  |
| 66 | C  | 0.0808  | 0.2852  | 8.3871  |
| 67 | C  | -0.2806 | -0.1435 | 7.0941  |
| 68 | H  | 0.4187  | -0.5472 | 5.0673  |
| 69 | H  | 3.4184  | 0.8528  | 7.8256  |
| 70 | H  | 1.7011  | 0.9852  | 9.6478  |
| 71 | H  | -0.6705 | 0.3522  | 9.172   |
| 72 | H  | -1.314  | -0.4081 | 6.8778  |
| 73 | O  | 4.3582  | 0.7076  | 5.4613  |
| 74 | C  | 4.3076  | -0.7895 | 5.4394  |
| 75 | H  | 4.7753  | -1.2536 | 4.5734  |
| 76 | H  | 4.4986  | -1.2646 | 6.4011  |
| 77 | C  | 3.0412  | -0.013  | 5.253   |
| 78 | H  | 2.6469  | 0.0471  | 4.2399  |

- Lowest energy conformation for [1-Cl-SC].

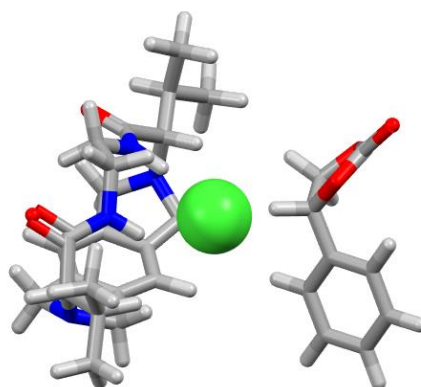

Cartesian coordinates (81 atoms), E (298.15 K) = -1814.735385 Hartree

|    |   |         |         |         |
|----|---|---------|---------|---------|
| 1  | H | -0.1791 | 1.5038  | 2.6666  |
| 2  | C | -0.5325 | 1.6087  | 1.6459  |
| 3  | C | -1.3806 | 1.683   | -1.0925 |
| 4  | C | -1.7747 | 1.1016  | 1.2549  |
| 5  | C | 0.3037  | 2.1057  | 0.6368  |
| 6  | C | -0.1081 | 2.1493  | -0.7088 |
| 7  | C | -2.1974 | 1.1303  | -0.0926 |
| 8  | H | -1.6839 | 1.6695  | -2.1373 |
| 9  | C | 1.7677  | 2.4895  | 0.741   |
| 10 | H | 1.8948  | 3.485   | 1.2022  |
| 11 | H | 2.3197  | 1.7784  | 1.3691  |
| 12 | C | 1.0603  | 2.6237  | -1.5683 |
| 13 | H | 0.9235  | 3.6695  | -1.8897 |
| 14 | C | -2.7701 | 0.2818  | 2.0631  |
| 15 | H | -2.2862 | -0.3578 | 2.8081  |
| 16 | H | -3.496  | 0.9247  | 2.5873  |
| 17 | C | -3.5096 | 0.3449  | -0.1938 |
| 18 | H | -3.5987 | -0.2522 | -1.104  |
| 19 | H | -4.3796 | 1.0175  | -0.131  |
| 20 | N | -3.4954 | -0.532  | 1.031   |
| 21 | C | -2.9581 | -1.931  | 0.8528  |
| 22 | H | -2.3919 | -2.1694 | 1.7644  |
| 23 | C | -2.0007 | -2.0757 | -0.3601 |
| 24 | N | -0.6609 | -2.0165 | -0.1223 |
| 25 | C | 0.2842  | -2.1255 | -1.2493 |
| 26 | H | 0.1077  | -3.0827 | -1.761  |
| 27 | H | 0.0816  | -1.3395 | -1.9869 |
| 28 | C | 1.7562  | -2.0552 | -0.8009 |
| 29 | H | 2.3703  | -2.4437 | -1.6196 |
| 30 | H | 1.907   | -2.6685 | 0.0941  |
| 31 | N | 2.2361  | -0.6978 | -0.4914 |
| 32 | C | 2.7446  | 0.1079  | -1.472  |
| 33 | C | 3.283   | 1.527   | -1.1093 |
| 34 | H | 3.6543  | 1.8888  | -2.0783 |
| 35 | N | 2.2568  | 2.5083  | -0.669  |



|    |    |         |         |         |
|----|----|---------|---------|---------|
| 36 | H  | 1.1947  | 2.0158  | -2.4716 |
| 37 | C  | 4.514   | 1.4602  | -0.1577 |
| 38 | H  | 4.1995  | 1.0449  | 0.8114  |
| 39 | C  | 5.595   | 0.516   | -0.7354 |
| 40 | H  | 6.4642  | 0.4816  | -0.0648 |
| 41 | H  | 5.221   | -0.5069 | -0.8574 |
| 42 | H  | 5.9348  | 0.8683  | -1.7193 |
| 43 | C  | 5.1054  | 2.868   | 0.082   |
| 44 | H  | 5.4545  | 3.3029  | -0.8658 |
| 45 | H  | 4.3612  | 3.5507  | 0.5034  |
| 46 | H  | 5.9627  | 2.8124  | 0.7675  |
| 47 | C  | -4.1226 | -2.9587 | 0.7367  |
| 48 | H  | -4.6752 | -2.7133 | -0.1814 |
| 49 | C  | -3.5857 | -4.4041 | 0.6057  |
| 50 | H  | -2.9833 | -4.5264 | -0.3008 |
| 51 | H  | -2.9675 | -4.6742 | 1.4752  |
| 52 | H  | -4.4201 | -5.1177 | 0.5571  |
| 53 | C  | -5.0767 | -2.8447 | 1.944   |
| 54 | H  | -5.4188 | -1.8115 | 2.061   |
| 55 | H  | -5.9501 | -3.4988 | 1.8096  |
| 56 | H  | -4.5715 | -3.1489 | 2.874   |
| 57 | O  | -2.4634 | -2.2407 | -1.5352 |
| 58 | O  | 2.8078  | -0.2753 | -2.683  |
| 59 | H  | -0.2805 | -1.8107 | 0.8109  |
| 60 | H  | 2.1249  | -0.4088 | 0.483   |
| 61 | C  | 2.8     | -0.3977 | 5.69    |
| 62 | C  | 3.2798  | -1.6904 | 6.0037  |
| 63 | C  | 4.068   | -1.8799 | 7.1563  |
| 64 | C  | 4.3644  | -0.7902 | 7.9986  |
| 65 | C  | 3.879   | 0.4947  | 7.6935  |
| 66 | C  | 3.0983  | 0.6859  | 6.5351  |
| 67 | H  | 2.2057  | -0.2597 | 4.7878  |
| 68 | H  | 4.4628  | -2.866  | 7.3814  |
| 69 | H  | 4.975   | -0.9463 | 8.8858  |
| 70 | H  | 4.1089  | 1.336   | 8.3444  |
| 71 | H  | 2.7263  | 1.6779  | 6.2868  |
| 72 | Cl | 1.1786  | -1.2646 | 2.5743  |
| 73 | C  | 1.4402  | -3.3382 | 5.1976  |
| 74 | H  | 0.7905  | -2.6455 | 5.7295  |
| 75 | H  | 1.0186  | -3.5908 | 4.2245  |
| 76 | O  | 1.5534  | -4.5786 | 6.0168  |
| 77 | C  | 2.8735  | -5.0048 | 6.0427  |
| 78 | O  | 3.2697  | -6.0533 | 6.5393  |
| 79 | O  | 3.6898  | -4.0621 | 5.4209  |
| 80 | C  | 2.9111  | -2.8387 | 5.077   |
| 81 | H  | 3.1228  | -2.5858 | 4.0374  |

- Lowest energy conformation for **3**.

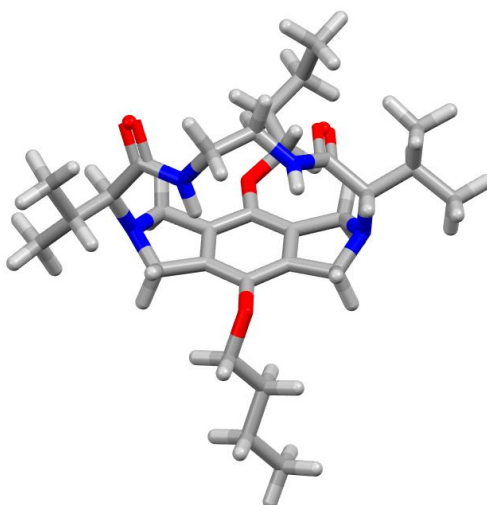

Cartesian coordinates (86 atoms). E (298.15 K) = -1691.051489 Hartree

|    |   |         |         |         |
|----|---|---------|---------|---------|
| 1  | C | -0.5834 | 1.1158  | 2.1472  |
| 2  | C | -1.5569 | 2.3481  | -0.2526 |
| 3  | C | -1.8331 | 0.7918  | 1.612   |
| 4  | C | 0.2111  | 2.0311  | 1.4331  |
| 5  | C | -0.2669 | 2.6144  | 0.2503  |
| 6  | C | -2.3379 | 1.3949  | 0.4348  |
| 7  | C | 1.6697  | 2.4313  | 1.636   |
| 8  | H | 1.759   | 3.2184  | 2.4031  |
| 9  | H | 2.2965  | 1.596   | 1.9697  |
| 10 | C | 0.8506  | 3.3923  | -0.4259 |
| 11 | H | 0.7019  | 4.479   | -0.3364 |
| 12 | C | -2.8011 | -0.2886 | 2.0742  |
| 13 | H | -2.3015 | -1.1888 | 2.4444  |
| 14 | H | -3.4508 | 0.0805  | 2.8827  |
| 15 | C | -3.7056 | 0.7457  | 0.1467  |
| 16 | H | -3.9223 | 0.5903  | -0.9072 |
| 17 | H | -4.5143 | 1.347   | 0.5878  |
| 18 | N | -3.6378 | -0.5675 | 0.8664  |
| 19 | C | -3.1906 | -1.7348 | 0.037   |
| 20 | H | -2.7708 | -2.4681 | 0.7422  |
| 21 | C | -2.0998 | -1.3704 | -1.0122 |
| 22 | N | -0.8023 | -1.7171 | -0.7209 |
| 23 | C | 0.3046  | -1.5096 | -1.6772 |
| 24 | H | 0.3751  | -2.384  | -2.343  |
| 25 | H | 0.0535  | -0.6485 | -2.3012 |
| 26 | C | 1.6763  | -1.3065 | -0.999  |
| 27 | H | 2.4504  | -1.5069 | -1.7459 |
| 28 | H | 1.8026  | -2.0315 | -0.1798 |
| 29 | N | 1.9402  | 0.0433  | -0.4836 |
| 30 | C | 2.7689  | 0.9217  | -1.1573 |
| 31 | C | 3.1335  | 2.285   | -0.4853 |

|    |   |         |         |         |
|----|---|---------|---------|---------|
| 32 | H | 3.3517  | 2.9355  | -1.3429 |
| 33 | N | 2.0799  | 2.9556  | 0.303   |
| 34 | H | 0.9158  | 3.1643  | -1.4966 |
| 35 | C | 4.4699  | 2.1698  | 0.3282  |
| 36 | H | 4.2751  | 1.5627  | 1.2263  |
| 37 | C | 5.5989  | 1.4756  | -0.4675 |
| 38 | H | 6.5223  | 1.4807  | 0.127   |
| 39 | H | 5.3587  | 0.4376  | -0.7189 |
| 40 | H | 5.7948  | 2.0005  | -1.411  |
| 41 | C | 4.9288  | 3.575   | 0.7834  |
| 42 | H | 5.1943  | 4.1909  | -0.0876 |
| 43 | H | 4.1394  | 4.097   | 1.3327  |
| 44 | H | 5.818   | 3.4981  | 1.4233  |
| 45 | C | -4.3973 | -2.4148 | -0.6766 |
| 46 | H | -4.825  | -1.6744 | -1.3681 |
| 47 | C | -3.9394 | -3.637  | -1.5077 |
| 48 | H | -3.2421 | -3.352  | -2.3033 |
| 49 | H | -3.4542 | -4.3897 | -0.8681 |
| 50 | H | -4.8058 | -4.1172 | -1.9803 |
| 51 | C | -5.4764 | -2.8267 | 0.346   |
| 52 | H | -5.7682 | -1.974  | 0.9661  |
| 53 | H | -6.3657 | -3.2125 | -0.1701 |
| 54 | H | -5.1058 | -3.6223 | 1.0104  |
| 55 | O | -2.3965 | -0.7752 | -2.0894 |
| 56 | O | 3.273   | 0.6191  | -2.2741 |
| 57 | H | -0.6104 | -2.2241 | 0.1361  |
| 58 | H | 1.4308  | 0.3552  | 0.3336  |
| 59 | O | -1.8886 | 3.0567  | -1.4093 |
| 60 | O | -0.0899 | 0.4011  | 3.2654  |
| 61 | C | -2.9104 | 2.5522  | -2.3487 |
| 62 | H | -2.7071 | 1.4982  | -2.5629 |
| 63 | H | -3.905  | 2.6516  | -1.8885 |
| 64 | C | -2.8204 | 3.4224  | -3.6032 |
| 65 | H | -2.9524 | 4.473   | -3.3089 |
| 66 | H | -1.8111 | 3.3311  | -4.0282 |
| 67 | C | -3.8747 | 3.0376  | -4.67   |
| 68 | H | -4.8817 | 3.0915  | -4.2264 |
| 69 | H | -3.8494 | 3.7927  | -5.4688 |
| 70 | C | -3.6569 | 1.6394  | -5.2927 |
| 71 | H | -2.6602 | 1.5693  | -5.7497 |
| 72 | H | -3.7345 | 0.8385  | -4.5471 |
| 73 | H | -4.4004 | 1.4405  | -6.0759 |
| 74 | C | 0.1225  | 1.1743  | 4.507   |
| 75 | H | 0.7165  | 0.5068  | 5.1405  |
| 76 | H | 0.7173  | 2.0731  | 4.2858  |
| 77 | C | -1.1955 | 1.5558  | 5.1946  |
| 78 | H | -1.7972 | 2.1757  | 4.5143  |
| 79 | H | -1.7708 | 0.6401  | 5.3938  |

|    |   |         |        |        |
|----|---|---------|--------|--------|
| 80 | C | -0.9588 | 2.3228 | 6.5156 |
| 81 | H | -0.3371 | 1.7121 | 7.1887 |
| 82 | H | -0.387  | 3.2408 | 6.309  |
| 83 | C | -2.2765 | 2.6909 | 7.2295 |
| 84 | H | -2.8535 | 1.7903 | 7.4794 |
| 85 | H | -2.0845 | 3.2371 | 8.1622 |
| 86 | H | -2.9059 | 3.3256 | 6.5912 |

- Lowest energy conformation for [3-Cl].

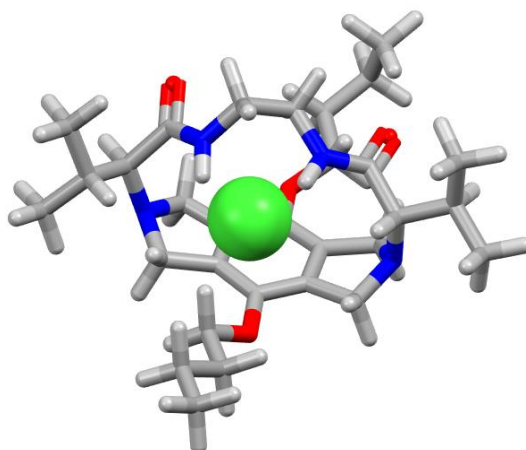

Cartesian coordinates (87 atoms). E (298.15 K) = -1706.129101 Hartree

|    |   |         |         |         |
|----|---|---------|---------|---------|
| 1  | C | -1.5172 | 2.2199  | 1.958   |
| 2  | C | -1.8957 | 2.723   | -0.8425 |
| 3  | C | -2.6191 | 1.7226  | 1.2549  |
| 4  | C | -0.5183 | 2.8644  | 1.2009  |
| 5  | C | -0.7291 | 3.1253  | -0.1649 |
| 6  | C | -2.8311 | 1.9539  | -0.1215 |
| 7  | C | 0.9017  | 3.2854  | 1.569   |
| 8  | H | 0.9003  | 4.1954  | 2.1934  |
| 9  | H | 1.4258  | 2.5108  | 2.1331  |
| 10 | C | 0.4998  | 3.799   | -0.7561 |
| 11 | H | 0.3299  | 4.8782  | -0.8984 |
| 12 | C | -3.6607 | 0.7414  | 1.7683  |
| 13 | H | -3.2445 | 0.0286  | 2.4848  |
| 14 | H | -4.5025 | 1.2567  | 2.2571  |
| 15 | C | -4.0907 | 1.152   | -0.5128 |
| 16 | H | -4.0802 | 0.7236  | -1.5119 |
| 17 | H | -4.9899 | 1.7799  | -0.41   |
| 18 | N | -4.157  | 0.0678  | 0.5231  |
| 19 | C | -3.4367 | -1.2207 | 0.1904  |
| 20 | H | -2.9147 | -1.5395 | 1.1034  |
| 21 | C | -2.3779 | -1.0802 | -0.9344 |
| 22 | N | -1.0716 | -1.0541 | -0.5732 |
| 23 | C | -0.0248 | -0.8965 | -1.6    |
| 24 | H | -0.1053 | -1.7257 | -2.3184 |
| 25 | H | -0.1932 | 0.0267  | -2.1679 |
| 26 | C | 1.3934  | -0.8807 | -0.9996 |
| 27 | H | 2.1032  | -1.0126 | -1.8225 |
| 28 | H | 1.5023  | -1.6952 | -0.2758 |
| 29 | N | 1.739   | 0.3697  | -0.3038 |
| 30 | C | 2.307   | 1.4152  | -0.9723 |
| 31 | C | 2.7032  | 2.7143  | -0.2004 |

|    |   |         |         |         |
|----|---|---------|---------|---------|
| 32 | H | 3.2105  | 3.2954  | -0.9837 |
| 33 | N | 1.5698  | 3.5612  | 0.2635  |
| 34 | H | 0.776   | 3.3841  | -1.7313 |
| 35 | C | 3.7645  | 2.4385  | 0.9043  |
| 36 | H | 3.3182  | 1.8093  | 1.6891  |
| 37 | C | 4.965   | 1.6571  | 0.3189  |
| 38 | H | 5.7185  | 1.4815  | 1.099   |
| 39 | H | 4.6599  | 0.6839  | -0.0817 |
| 40 | H | 5.4398  | 2.2229  | -0.495  |
| 41 | C | 4.2519  | 3.7575  | 1.5473  |
| 42 | H | 4.7279  | 4.3971  | 0.79    |
| 43 | H | 3.4247  | 4.3253  | 1.984   |
| 44 | H | 4.9922  | 3.5515  | 2.3335  |
| 45 | C | -4.4607 | -2.3324 | -0.1906 |
| 46 | H | -4.9761 | -1.991  | -1.1    |
| 47 | C | -3.7484 | -3.6692 | -0.507  |
| 48 | H | -3.0777 | -3.5729 | -1.3681 |
| 49 | H | -3.1577 | -4.0125 | 0.3553  |
| 50 | H | -4.487  | -4.4498 | -0.7387 |
| 51 | C | -5.5001 | -2.5259 | 0.9332  |
| 52 | H | -5.9709 | -1.5691 | 1.1805  |
| 53 | H | -6.2777 | -3.2394 | 0.624   |
| 54 | H | -5.0235 | -2.9224 | 1.8431  |
| 55 | O | -2.7374 | -0.9979 | -2.1602 |
| 56 | O | 2.547   | 1.3587  | -2.2216 |
| 57 | H | -0.7727 | -1.0774 | 0.418   |
| 58 | H | 1.5018  | 0.3756  | 0.6943  |
| 59 | O | -1.9842 | 3.1219  | -2.1922 |
| 60 | O | -1.5408 | 2.0317  | 3.3487  |
| 61 | C | -2.6732 | 2.2507  | -3.1572 |
| 62 | H | -2.4258 | 1.2043  | -2.9521 |
| 63 | H | -3.7621 | 2.3853  | -3.0571 |
| 64 | C | -2.2172 | 2.6687  | -4.5566 |
| 65 | H | -2.4572 | 3.732   | -4.7036 |
| 66 | H | -1.1238 | 2.5738  | -4.6143 |
| 67 | C | -2.8778 | 1.816   | -5.6679 |
| 68 | H | -3.9741 | 1.872   | -5.5677 |
| 69 | H | -2.6323 | 2.262   | -6.644  |
| 70 | C | -2.4357 | 0.3334  | -5.6617 |
| 71 | H | -1.3451 | 0.2576  | -5.7764 |
| 72 | H | -2.7037 | -0.1744 | -4.7276 |
| 73 | H | -2.9009 | -0.2165 | -6.4923 |
| 74 | C | -0.2964 | 1.7649  | 4.0941  |
| 75 | H | 0.3199  | 1.0648  | 3.5176  |
| 76 | H | 0.2325  | 2.716   | 4.2692  |
| 77 | C | -0.7    | 1.1144  | 5.417   |
| 78 | H | -1.3623 | 1.7897  | 5.9804  |
| 79 | H | -1.2717 | 0.2066  | 5.1844  |

|    |    |         |         |        |
|----|----|---------|---------|--------|
| 80 | C  | 0.5347  | 0.7409  | 6.2672 |
| 81 | H  | 1.1675  | 0.0568  | 5.6837 |
| 82 | H  | 1.1365  | 1.643   | 6.4659 |
| 83 | C  | 0.1518  | 0.076   | 7.6062 |
| 84 | H  | -0.422  | -0.8441 | 7.4297 |
| 85 | H  | 1.0423  | -0.189  | 8.1934 |
| 86 | H  | -0.4701 | 0.7467  | 8.2169 |
| 87 | Cl | 0.4615  | -1.0487 | 2.2875 |

- Lowest energy conformation for [3-Int2].

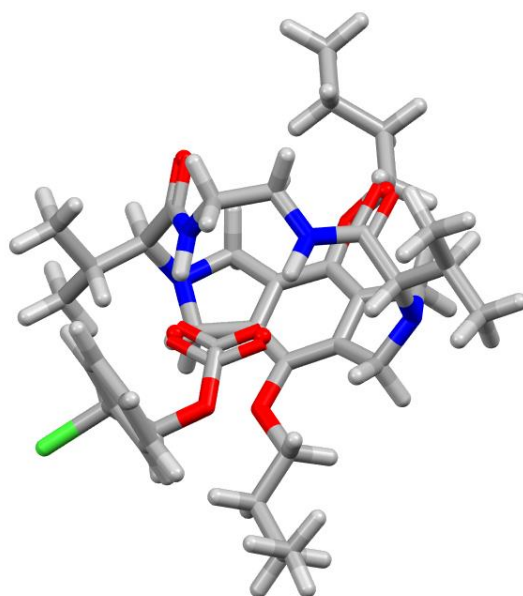

Cartesian coordinates (107 atoms). E (298.15 K) = -2279.366513 Hartree

|    |   |         |         |         |
|----|---|---------|---------|---------|
| 1  | C | -0.6792 | 2.8836  | 1.3672  |
| 2  | C | -1.1517 | -2.2925 | 1.3975  |
| 3  | C | -1.8745 | 2.2762  | 0.9542  |
| 4  | C | 0.3186  | 3.0686  | 0.3966  |
| 5  | C | 0.0897  | -2.7898 | 0.9518  |
| 6  | C | -2.1186 | -1.9928 | 0.4184  |
| 7  | C | 1.7708  | 3.4415  | 0.6165  |
| 8  | H | 1.8823  | 4.5154  | 0.8383  |
| 9  | H | 2.1929  | 2.8937  | 1.4641  |
| 10 | C | 1.371   | 3.0323  | -1.7375 |
| 11 | H | 1.3164  | 3.977   | -2.3013 |
| 12 | C | -3.0124 | 1.666   | 1.7816  |
| 13 | H | -2.6525 | 1.1675  | 2.6833  |
| 14 | H | -3.7591 | 2.4229  | 2.072   |
| 15 | C | -3.4791 | 1.2753  | -0.501  |
| 16 | H | -3.5406 | 0.499   | -1.2607 |
| 17 | H | -4.2879 | 2.0022  | -0.6783 |
| 18 | N | -3.6571 | 0.6837  | 0.8622  |
| 19 | C | -3.1909 | -0.7395 | 1.0396  |
| 20 | H | -2.7815 | -0.8111 | 2.0557  |
| 21 | C | -2.0731 | -1.147  | 0.0435  |
| 22 | N | -0.7927 | -1.0952 | 0.4858  |
| 23 | C | 0.3055  | -1.4613 | -0.4261 |
| 24 | H | 0.1465  | -2.4956 | -0.7654 |
| 25 | H | 0.2788  | -0.8362 | -1.3258 |
| 26 | C | 1.6964  | -1.353  | 0.2287  |
| 27 | H | 2.3803  | -1.9745 | -0.3622 |
| 28 | H | 1.6637  | -1.7382 | 1.2546  |



|    |    |         |         |         |
|----|----|---------|---------|---------|
| 29 | N  | 2.2496  | 0.0086  | 0.2853  |
| 30 | C  | 2.8172  | 0.5686  | -0.8202 |
| 31 | C  | 3.4329  | 1.9988  | -0.728  |
| 32 | H  | 3.9468  | 2.0966  | -1.695  |
| 33 | N  | 2.4387  | 3.1088  | -0.6831 |
| 34 | H  | 1.5803  | 2.2331  | -2.4562 |
| 35 | C  | 4.5244  | 2.1088  | 0.3761  |
| 36 | H  | 4.0634  | 1.9415  | 1.3602  |
| 37 | C  | 5.6018  | 1.0163  | 0.1762  |
| 38 | H  | 6.3641  | 1.0872  | 0.9641  |
| 39 | H  | 5.1697  | 0.0096  | 0.212   |
| 40 | H  | 6.1025  | 1.135   | -0.7955 |
| 41 | C  | 5.1795  | 3.5087  | 0.3734  |
| 42 | H  | 5.6631  | 3.7042  | -0.595  |
| 43 | H  | 4.4399  | 4.2981  | 0.5375  |
| 44 | H  | 5.9466  | 3.5746  | 1.1582  |
| 45 | C  | -4.3884 | -1.7287 | 0.933   |
| 46 | H  | -4.7867 | -1.6444 | -0.0885 |
| 47 | C  | -3.9274 | -3.1897 | 1.1515  |
| 48 | H  | -3.2132 | -3.501  | 0.3818  |
| 49 | H  | -3.4514 | -3.3063 | 2.1367  |
| 50 | H  | -4.7881 | -3.8726 | 1.113   |
| 51 | C  | -5.4977 | -1.3559 | 1.9391  |
| 52 | H  | -5.785  | -0.3068 | 1.8151  |
| 53 | H  | -6.3839 | -1.9906 | 1.7934  |
| 54 | H  | -5.1503 | -1.4975 | 2.9743  |
| 55 | O  | -2.3652 | -1.5083 | -1.1483 |
| 56 | O  | 2.8612  | -0.0462 | -1.9363 |
| 57 | H  | -0.5716 | -0.726  | 1.4295  |
| 58 | H  | 2.2085  | 0.4639  | 1.2115  |
| 59 | C  | 3.4439  | -1.8821 | 6.4649  |
| 60 | C  | 2.6966  | -0.6974 | 6.65    |
| 61 | C  | 1.6978  | -0.674  | 7.6483  |
| 62 | C  | 1.4616  | -1.8047 | 8.4488  |
| 63 | C  | 2.2182  | -2.9783 | 8.2623  |
| 64 | C  | 3.2102  | -3.0151 | 7.2633  |
| 65 | H  | 4.2077  | -1.9121 | 5.6903  |
| 66 | H  | 1.0926  | 0.2164  | 7.7875  |
| 67 | H  | 0.6835  | -1.7757 | 9.2085  |
| 68 | H  | 2.0305  | -3.8543 | 8.8799  |
| 69 | H  | 3.7919  | -3.9205 | 7.1044  |
| 70 | Cl | 4.3857  | 1.565   | 6.6492  |
| 71 | C  | 2.9928  | 0.4921  | 5.778   |
| 72 | H  | 3.4781  | 0.2079  | 4.8457  |
| 73 | C  | 1.8609  | 1.4881  | 5.4963  |
| 74 | H  | 1.4959  | 1.9432  | 6.422   |
| 75 | H  | 2.2349  | 2.2646  | 4.8233  |
| 76 | O  | -0.3207 | 3.2875  | 2.6653  |

|     |   |         |         |         |
|-----|---|---------|---------|---------|
| 77  | O | -1.2742 | 2.1449  | -2.7933 |
| 78  | C | -1.3156 | 3.3519  | 3.7394  |
| 79  | H | -1.4593 | 2.3473  | 4.1502  |
| 80  | H | -2.2677 | 3.7349  | 3.3422  |
| 81  | C | -0.761  | 4.3116  | 4.7958  |
| 82  | H | -0.5214 | 5.2637  | 4.3016  |
| 83  | H | 0.1823  | 3.904   | 5.1816  |
| 84  | C | -2.0938 | 1.0652  | -3.3719 |
| 85  | H | -1.9575 | 0.139   | -2.7995 |
| 86  | H | -3.1534 | 1.3608  | -3.3315 |
| 87  | C | -1.6435 | 0.8896  | -4.8247 |
| 88  | H | -2.37   | 0.2298  | -5.3275 |
| 89  | H | -1.6887 | 1.8664  | -5.3303 |
| 90  | C | -0.2257 | 0.2941  | -4.9589 |
| 91  | H | 0.4844  | 0.933   | -4.4203 |
| 92  | H | -0.198  | -0.6861 | -4.4608 |
| 93  | C | 0.2185  | 0.1425  | -6.4285 |
| 94  | H | 0.2258  | 1.1165  | -6.9392 |
| 95  | H | 1.2304  | -0.2793 | -6.4927 |
| 96  | H | -0.4612 | -0.5213 | -6.9835 |
| 97  | C | -1.7396 | 4.5658  | 5.9676  |
| 98  | H | -1.3123 | 5.3494  | 6.6116  |
| 99  | H | -2.6859 | 4.9709  | 5.5738  |
| 100 | C | -2.0348 | 3.3162  | 6.8286  |
| 101 | H | -2.5465 | 2.5364  | 6.2522  |
| 102 | H | -1.1024 | 2.8789  | 7.2106  |
| 103 | H | -2.6698 | 3.571   | 7.6886  |
| 104 | O | 0.7006  | 0.8215  | 4.9102  |
| 105 | C | 0.8082  | 0.4477  | 3.5172  |
| 106 | O | -0.2542 | -0.0675 | 3.0482  |
| 107 | O | 1.9414  | 0.6732  | 2.9553  |

- Lowest energy conformation for [3-Int1].

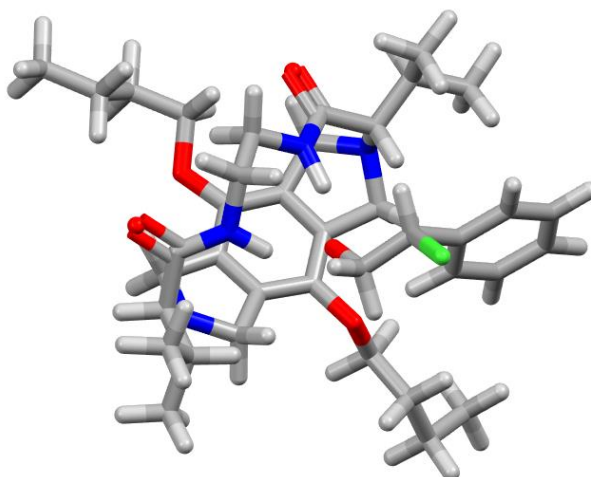

Cartesian coordinates (104 atoms). E (298.15 K) = -2090.782308 Hartree

|    |   |         |         |         |
|----|---|---------|---------|---------|
| 1  | C | -0.6294 | 2.3459  | 1.7421  |
| 2  | C | -1.287  | 2.2232  | -1.0356 |
| 3  | C | -1.8289 | 1.786   | 1.3056  |
| 4  | C | 0.299   | 2.7351  | 0.7668  |
| 5  | C | -0.0343 | 2.6987  | -0.5906 |
| 6  | C | -2.1707 | 1.7025  | -0.0691 |
| 7  | C | 1.7758  | 3.0115  | 0.9437  |
| 8  | H | 1.9651  | 3.9655  | 1.4647  |
| 9  | H | 2.214   | 2.2147  | 1.5558  |
| 10 | C | 1.1761  | 3.0752  | -1.4251 |
| 11 | H | 1.0629  | 4.0734  | -1.8788 |
| 12 | C | -2.8374 | 0.9744  | 2.1115  |
| 13 | H | -2.3864 | 0.4532  | 2.9583  |
| 14 | H | -3.6605 | 1.6025  | 2.4921  |
| 15 | C | -3.4566 | 0.848   | -0.1442 |
| 16 | H | -3.5421 | 0.2074  | -1.0169 |
| 17 | H | -4.3521 | 1.4868  | -0.0823 |
| 18 | N | -3.3966 | 0.019   | 1.1036  |
| 19 | C | -2.6101 | -1.2788 | 1.0112  |
| 20 | H | -1.9303 | -1.3088 | 1.873   |
| 21 | C | -1.7522 | -1.4139 | -0.2729 |
| 22 | N | -0.4055 | -1.3298 | -0.1528 |
| 23 | C | 0.4225  | -1.452  | -1.3684 |
| 24 | H | 0.1902  | -2.4061 | -1.8646 |
| 25 | H | 0.1608  | -0.6582 | -2.0822 |
| 26 | C | 1.9311  | -1.3868 | -1.0632 |
| 27 | H | 2.4827  | -1.6068 | -1.9823 |
| 28 | H | 2.185   | -2.14   | -0.3055 |
| 29 | N | 2.3667  | -0.067  | -0.5779 |
| 30 | C | 3.086   | 0.7705  | -1.3747 |
| 31 | C | 3.4607  | 2.1945  | -0.8516 |
| 32 | H | 3.9002  | 2.6575  | -1.7478 |

|    |    |         |         |         |
|----|----|---------|---------|---------|
| 33 | N  | 2.3116  | 3.042   | -0.4504 |
| 34 | H  | 1.3341  | 2.3679  | -2.2493 |
| 35 | C  | 4.5915  | 2.1525  | 0.2185  |
| 36 | H  | 4.1933  | 1.7033  | 1.1399  |
| 37 | C  | 5.7705  | 1.2713  | -0.2556 |
| 38 | H  | 6.5742  | 1.2821  | 0.4938  |
| 39 | H  | 5.4627  | 0.2316  | -0.4115 |
| 40 | H  | 6.1791  | 1.6419  | -1.2058 |
| 41 | C  | 5.0895  | 3.5804  | 0.5428  |
| 42 | H  | 5.5319  | 4.0418  | -0.3523 |
| 43 | H  | 4.2714  | 4.2253  | 0.8784  |
| 44 | H  | 5.8603  | 3.5519  | 1.3263  |
| 45 | C  | -3.5812 | -2.4938 | 1.1178  |
| 46 | H  | -4.2537 | -2.4349 | 0.2498  |
| 47 | C  | -2.8134 | -3.8357 | 1.0517  |
| 48 | H  | -2.2846 | -3.9496 | 0.0986  |
| 49 | H  | -2.0791 | -3.906  | 1.8677  |
| 50 | H  | -3.5103 | -4.6795 | 1.1557  |
| 51 | C  | -4.4193 | -2.4161 | 2.4114  |
| 52 | H  | -4.9398 | -1.4544 | 2.4677  |
| 53 | H  | -5.1637 | -3.2254 | 2.4386  |
| 54 | H  | -3.7788 | -2.5179 | 3.3005  |
| 55 | O  | -2.3217 | -1.6224 | -1.4035 |
| 56 | O  | 3.4686  | 0.4462  | -2.5481 |
| 57 | H  | 0.1032  | -1.0471 | 0.7389  |
| 58 | H  | 2.0192  | 0.1205  | 0.3981  |
| 59 | C  | -0.3121 | -3.1785 | 4.9237  |
| 60 | C  | 0.3067  | -2.088  | 4.2678  |
| 61 | C  | -0.1641 | -0.7801 | 4.525   |
| 62 | C  | -1.2148 | -0.5778 | 5.442   |
| 63 | C  | -1.8152 | -1.6654 | 6.1027  |
| 64 | C  | -1.3619 | -2.973  | 5.8345  |
| 65 | H  | 0.0513  | -4.1859 | 4.7347  |
| 66 | H  | 0.2464  | 0.0597  | 3.9725  |
| 67 | H  | -1.5716 | 0.4337  | 5.6263  |
| 68 | H  | -2.6288 | -1.5004 | 6.8069  |
| 69 | H  | -1.8223 | -3.824  | 6.3329  |
| 70 | Cl | 2.8473  | -3.3648 | 4.2297  |
| 71 | C  | 1.4348  | -2.3285 | 3.289   |
| 72 | H  | 1.1581  | -3.046  | 2.512   |
| 73 | C  | 2.1147  | -1.0947 | 2.6701  |
| 74 | H  | 2.4576  | -0.4371 | 3.4936  |
| 75 | H  | 3.0258  | -1.4468 | 2.1456  |
| 76 | O  | 1.1998  | -0.4383 | 1.7969  |
| 77 | O  | -0.2823 | 2.3995  | 3.119   |
| 78 | O  | -1.4731 | 2.2821  | -2.4269 |
| 79 | C  | -0.9189 | 3.4975  | 3.861   |
| 80 | H  | -2.0051 | 3.3247  | 3.9076  |

|     |   |         |        |         |
|-----|---|---------|--------|---------|
| 81  | H | -0.7443 | 4.4483 | 3.3309  |
| 82  | C | -0.2893 | 3.5329 | 5.2561  |
| 83  | H | 0.7978  | 3.6297 | 5.1313  |
| 84  | H | -0.463  | 2.5678 | 5.7522  |
| 85  | C | -2.4871 | 1.4474 | -3.0897 |
| 86  | H | -2.3384 | 0.3952 | -2.8141 |
| 87  | H | -3.488  | 1.7695 | -2.7647 |
| 88  | C | -2.3188 | 1.653  | -4.5966 |
| 89  | H | -3.1586 | 1.1482 | -5.1019 |
| 90  | H | -2.4023 | 2.727  | -4.8223 |
| 91  | C | -0.9832 | 1.1068 | -5.1452 |
| 92  | H | -0.1546 | 1.6014 | -4.6236 |
| 93  | H | -0.9082 | 0.0352 | -4.9064 |
| 94  | C | -0.8398 | 1.3097 | -6.6676 |
| 95  | H | -0.8858 | 2.3771 | -6.9282 |
| 96  | H | 0.1192  | 0.9167 | -7.0306 |
| 97  | H | -1.6446 | 0.7964 | -7.2144 |
| 98  | C | -0.8191 | 4.6838 | 6.1441  |
| 99  | H | -0.2192 | 4.7141 | 7.0658  |
| 100 | H | -0.6532 | 5.6463 | 5.6345  |
| 101 | C | -2.3122 | 4.5557 | 6.5247  |
| 102 | H | -2.9641 | 4.6229 | 5.6443  |
| 103 | H | -2.5074 | 3.5901 | 7.0118  |
| 104 | H | -2.6113 | 5.3511 | 7.2211  |

- Lowest energy conformation for 2-

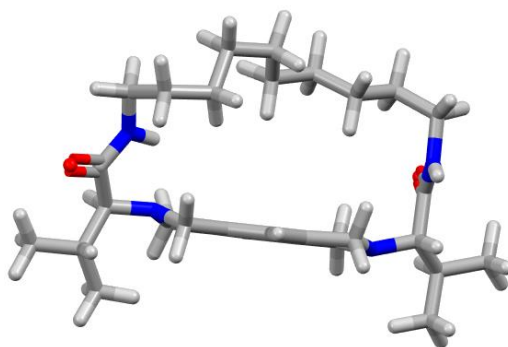

Cartesian coordinates (84 atoms). E (298.15 K) = -1540.660439 Hartree

|    |   |         |         |         |
|----|---|---------|---------|---------|
| 1  | H | 2.002   | -3.1779 | 1.4651  |
| 2  | C | 1.8259  | -2.158  | 1.1297  |
| 3  | C | 1.3547  | 0.5206  | 0.2445  |
| 4  | C | 1.422   | -1.1579 | 2.029   |
| 5  | C | 1.9829  | -1.8045 | -0.2219 |
| 6  | C | 1.7403  | -0.4849 | -0.6565 |
| 7  | C | 1.1995  | 0.1668  | 1.5928  |
| 8  | H | 1.1733  | 1.5389  | -0.0933 |
| 9  | C | 2.3683  | -2.6843 | -1.3971 |
| 10 | H | 3.3223  | -3.2064 | -1.2288 |
| 11 | H | 1.6081  | -3.4596 | -1.5937 |
| 12 | C | 1.9054  | -0.3941 | -2.159  |
| 13 | H | 2.5685  | 0.4292  | -2.4674 |
| 14 | C | 1.1632  | -1.2583 | 3.5234  |
| 15 | H | 0.5095  | -2.1038 | 3.7856  |
| 16 | H | 2.1089  | -1.3948 | 4.0769  |
| 17 | C | 0.8017  | 1.0397  | 2.7674  |
| 18 | H | -0.0752 | 1.6698  | 2.5585  |
| 19 | H | 1.6258  | 1.7211  | 3.0492  |
| 20 | N | 0.4892  | 0.0338  | 3.8113  |
| 21 | C | 0.2049  | 0.4677  | 5.1886  |
| 22 | H | 0.0692  | -0.4548 | 5.7776  |
| 23 | C | -1.1856 | 1.1921  | 5.1966  |
| 24 | N | -2.075  | 0.6799  | 4.2876  |
| 25 | C | -3.4336 | 1.2066  | 4.1033  |
| 26 | H | -4.1268 | 0.3617  | 3.9978  |
| 27 | C | -1.3814 | -2.5075 | -4.787  |
| 28 | H | -1.9335 | -1.701  | -5.2878 |
| 29 | N | 0.0003  | -2.0248 | -4.5772 |
| 30 | C | 1.0198  | -2.8476 | -4.1525 |
| 31 | C | 2.3947  | -2.1656 | -3.9125 |
| 32 | H | 2.4607  | -1.2636 | -4.542  |
| 33 | N | 2.489   | -1.7082 | -2.5145 |
| 34 | H | 0.9189  | -0.2138 | -2.6343 |
| 35 | C | 3.5612  | -3.1082 | -4.3163 |
| 36 | H | 3.4664  | -4.0241 | -3.7161 |
| 37 | C | 3.4553  | -3.5089 | -5.8057 |

|    |   |         |         |         |
|----|---|---------|---------|---------|
| 38 | H | 3.5021  | -2.623  | -6.4571 |
| 39 | H | 4.2904  | -4.1655 | -6.0822 |
| 40 | H | 2.5249  | -4.0487 | -6.0143 |
| 41 | C | 4.9259  | -2.4497 | -4.023  |
| 42 | H | 4.9901  | -2.1177 | -2.9815 |
| 43 | H | 5.7433  | -3.1563 | -4.2196 |
| 44 | H | 5.0831  | -1.5708 | -4.666  |
| 45 | C | 1.2962  | 1.3226  | 5.9194  |
| 46 | H | 1.2156  | 2.358   | 5.557   |
| 47 | C | 1.0429  | 1.3381  | 7.4472  |
| 48 | H | 1.8104  | 1.9383  | 7.9548  |
| 49 | H | 0.0628  | 1.7623  | 7.6756  |
| 50 | H | 1.0947  | 0.3179  | 7.8581  |
| 51 | C | 2.7293  | 0.8104  | 5.6437  |
| 52 | H | 3.4553  | 1.4527  | 6.1598  |
| 53 | H | 2.8659  | -0.2111 | 6.0276  |
| 54 | H | 2.9861  | 0.8092  | 4.5783  |
| 55 | O | -1.4737 | 2.1401  | 5.9771  |
| 56 | O | 0.8241  | -4.0698 | -3.8966 |
| 57 | H | -1.6873 | -0.0124 | 3.6514  |
| 58 | H | 0.2143  | -1.0585 | -4.7892 |
| 59 | H | -3.6941 | 1.7467  | 5.0193  |
| 60 | H | -1.3459 | -3.3681 | -5.4684 |
| 61 | C | -2.109  | -2.937  | -3.4931 |
| 62 | H | -1.5515 | -3.7723 | -3.0533 |
| 63 | C | -3.5564 | 2.162   | 2.8892  |
| 64 | H | -2.8528 | 2.9922  | 3.0417  |
| 65 | H | -3.0943 | -3.3324 | -3.7868 |
| 66 | H | -4.568  | 2.5977  | 2.8955  |
| 67 | C | -2.2983 | -1.8264 | -2.4387 |
| 68 | H | -1.3233 | -1.3733 | -2.2012 |
| 69 | H | -2.9324 | -1.0241 | -2.8475 |
| 70 | C | -3.2955 | 1.4932  | 1.5172  |
| 71 | H | -2.347  | 0.9379  | 1.5584  |
| 72 | H | -3.1539 | 2.2768  | 0.7568  |
| 73 | C | -2.9174 | -2.3875 | -1.1369 |
| 74 | H | -2.29   | -3.2262 | -0.7973 |
| 75 | H | -3.9093 | -2.8138 | -1.3607 |
| 76 | C | -4.437  | 0.5582  | 1.0499  |
| 77 | H | -4.7006 | -0.1444 | 1.8561  |
| 78 | H | -5.3345 | 1.1701  | 0.8686  |
| 79 | C | -3.0521 | -1.3695 | 0.0188  |
| 80 | H | -3.3346 | -1.9176 | 0.9326  |
| 81 | H | -2.0666 | -0.9216 | 0.2164  |
| 82 | C | -4.1065 | -0.2622 | -0.2212 |
| 83 | H | -3.7691 | 0.4184  | -1.0183 |
| 84 | H | -5.0309 | -0.7367 | -0.5874 |

- Lowest energy conformation for [2-Cl]-.

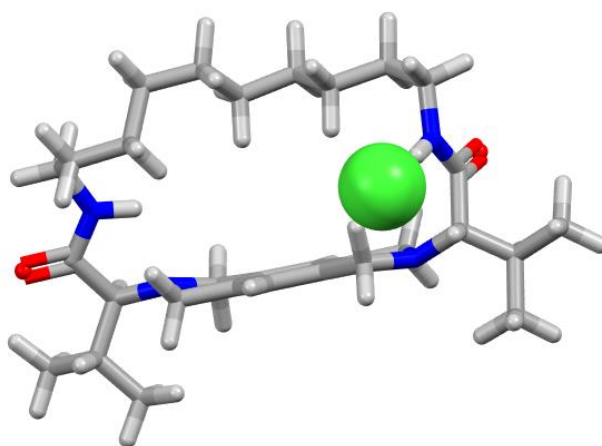

Cartesian coordinates (85 atoms). E (298.15 K) = -1555.727275 Hartree

|    |   |         |         |         |
|----|---|---------|---------|---------|
| 1  | H | 1.8598  | -3.1968 | 1.4499  |
| 2  | C | 1.7427  | -2.1639 | 1.1261  |
| 3  | C | 1.4159  | 0.542   | 0.2665  |
| 4  | C | 1.361   | -1.1585 | 2.0309  |
| 5  | C | 1.9559  | -1.8008 | -0.2149 |
| 6  | C | 1.7864  | -0.464  | -0.6417 |
| 7  | C | 1.2075  | 0.1781  | 1.6065  |
| 8  | H | 1.2823  | 1.5685  | -0.0685 |
| 9  | C | 2.3294  | -2.6819 | -1.3932 |
| 10 | H | 3.2469  | -3.2628 | -1.1976 |
| 11 | H | 1.5357  | -3.4154 | -1.6179 |
| 12 | C | 2.0264  | -0.3507 | -2.1288 |
| 13 | H | 2.7727  | 0.4206  | -2.374  |
| 14 | C | 1.0587  | -1.2697 | 3.5161  |
| 15 | H | 0.3515  | -2.0817 | 3.7473  |
| 16 | H | 1.9788  | -1.4663 | 4.0962  |
| 17 | C | 0.8138  | 1.055   | 2.781   |
| 18 | H | -0.0386 | 1.714   | 2.5579  |
| 19 | H | 1.651   | 1.7101  | 3.0868  |
| 20 | N | 0.4496  | 0.053   | 3.8153  |
| 21 | C | 0.1711  | 0.4735  | 5.1951  |
| 22 | H | 0.0232  | -0.4536 | 5.7746  |
| 23 | C | -1.2114 | 1.215   | 5.2224  |
| 24 | N | -2.0739 | 0.785   | 4.2509  |
| 25 | C | -3.4133 | 1.3465  | 4.0401  |
| 26 | H | -4.138  | 0.5238  | 3.9685  |
| 27 | C | -1.3601 | -2.5975 | -4.7348 |
| 28 | H | -1.9219 | -1.7992 | -5.2368 |
| 29 | N | -0.0036 | -2.0824 | -4.5188 |
| 30 | C | 1.0255  | -2.8698 | -4.114  |
| 31 | C | 2.3793  | -2.1359 | -3.9027 |
| 32 | H | 2.3618  | -1.215  | -4.5021 |
| 33 | N | 2.5307  | -1.7059 | -2.4948 |



|    |   |         |         |         |
|----|---|---------|---------|---------|
| 34 | H | 1.1183  | -0.0633 | -2.6863 |
| 35 | C | 3.5679  | -3.0182 | -4.3759 |
| 36 | H | 3.5513  | -3.9451 | -3.7833 |
| 37 | C | 3.4069  | -3.4075 | -5.8638 |
| 38 | H | 3.3391  | -2.5101 | -6.4963 |
| 39 | H | 4.271   | -3.9964 | -6.2047 |
| 40 | H | 2.5038  | -4.0083 | -6.018  |
| 41 | C | 4.9115  | -2.2943 | -4.1434 |
| 42 | H | 4.992   | -1.96   | -3.103  |
| 43 | H | 5.7586  | -2.957  | -4.3752 |
| 44 | H | 4.9902  | -1.4064 | -4.7884 |
| 45 | C | 1.2818  | 1.2982  | 5.9345  |
| 46 | H | 1.2304  | 2.3365  | 5.5744  |
| 47 | C | 1.0336  | 1.3144  | 7.4633  |
| 48 | H | 1.821   | 1.8891  | 7.9715  |
| 49 | H | 0.0648  | 1.7625  | 7.6938  |
| 50 | H | 1.0572  | 0.2903  | 7.8678  |
| 51 | C | 2.6996  | 0.7469  | 5.654   |
| 52 | H | 3.4465  | 1.3696  | 6.1655  |
| 53 | H | 2.8072  | -0.2781 | 6.0381  |
| 54 | H | 2.948   | 0.7343  | 4.5876  |
| 55 | O | -1.5137 | 2.1018  | 6.071   |
| 56 | O | 0.899   | -4.1184 | -3.8658 |
| 57 | H | -1.6642 | 0.132   | 3.5846  |
| 58 | H | 0.1608  | -1.0659 | -4.7207 |
| 59 | H | -3.6547 | 1.9348  | 4.9315  |
| 60 | H | -1.3151 | -3.4666 | -5.4081 |
| 61 | C | -2.0876 | -3.0336 | -3.4403 |
| 62 | H | -1.5084 | -3.8497 | -2.9894 |
| 63 | C | -3.4975 | 2.244   | 2.7797  |
| 64 | H | -2.7702 | 3.0601  | 2.8972  |
| 65 | H | -3.0687 | -3.4515 | -3.725  |
| 66 | H | -4.4967 | 2.7083  | 2.7555  |
| 67 | C | -2.2907 | -1.9069 | -2.4062 |
| 68 | H | -1.322  | -1.433  | -2.1936 |
| 69 | H | -2.9322 | -1.1212 | -2.8335 |
| 70 | C | -3.2462 | 1.5039  | 1.4429  |
| 71 | H | -2.3072 | 0.9362  | 1.5077  |
| 72 | H | -3.0891 | 2.246   | 0.6458  |
| 73 | C | -2.8974 | -2.4465 | -1.0903 |
| 74 | H | -2.2606 | -3.2727 | -0.7361 |
| 75 | H | -3.8891 | -2.8858 | -1.2962 |
| 76 | C | -4.4006 | 0.5655  | 1.0167  |
| 77 | H | -4.6671 | -0.1059 | 1.8491  |
| 78 | H | -5.2925 | 1.1816  | 0.8172  |
| 79 | C | -3.0306 | -1.4047 | 0.0446  |
| 80 | H | -3.3143 | -1.9276 | 0.9745  |
| 81 | H | -2.0437 | -0.9538 | 0.2253  |

|    |    |         |         |         |
|----|----|---------|---------|---------|
| 82 | C  | -4.0804 | -0.3005 | -0.2264 |
| 83 | H  | -3.7404 | 0.3481  | -1.047  |
| 84 | H  | -5.0093 | -0.7819 | -0.5734 |
| 85 | Cl | 0.3974  | 0.9527  | -5.0551 |

- Lowest energy conformation for [1-SO-I]-.

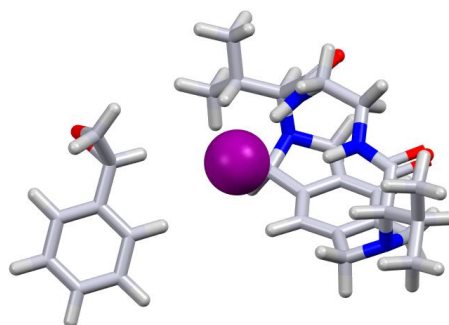

Cartesian coordinates (78 atoms). E (298.15 K) = -1622.601684Hartree

|    |   |         |         |         |
|----|---|---------|---------|---------|
| 1  | H | -0.8674 | 1.562   | 2.2136  |
| 2  | C | -1.1166 | 1.652   | 1.1608  |
| 3  | C | -1.6702 | 1.719   | -1.6531 |
| 4  | C | -2.2498 | 1.031   | 0.626   |
| 5  | C | -0.2337 | 2.2624  | 0.2575  |
| 6  | C | -0.5041 | 2.3057  | -1.124  |
| 7  | C | -2.5258 | 1.0542  | -0.7591 |
| 8  | H | -1.8587 | 1.709   | -2.7247 |
| 9  | C | 1.1566  | 2.8069  | 0.5301  |
| 10 | H | 1.116   | 3.7992  | 1.0095  |
| 11 | H | 1.7174  | 2.1504  | 1.2045  |
| 12 | C | 0.6849  | 2.9427  | -1.839  |
| 13 | H | 0.4622  | 3.9819  | -2.1328 |
| 14 | C | -3.2487 | 0.1061  | 1.3076  |
| 15 | H | -2.8007 | -0.5001 | 2.1016  |
| 16 | H | -4.0865 | 0.6712  | 1.7479  |
| 17 | C | -3.7367 | 0.1505  | -1.0167 |
| 18 | H | -3.6675 | -0.4306 | -1.9391 |
| 19 | H | -4.6695 | 0.7357  | -1.0425 |
| 20 | N | -3.774  | -0.75   | 0.1913  |
| 21 | C | -3.0855 | -2.0847 | 0.0548  |
| 22 | H | -2.6313 | -2.3054 | 1.0313  |
| 23 | C | -1.9628 | -2.0971 | -1.0176 |
| 24 | N | -0.6732 | -1.9274 | -0.6041 |
| 25 | C | 0.4139  | -1.917  | -1.6026 |
| 26 | H | 0.4088  | -2.8822 | -2.1294 |
| 27 | H | 0.2159  | -1.1509 | -2.3601 |
| 28 | C | 1.8045  | -1.6914 | -0.9812 |
| 29 | H | 2.5457  | -2.0232 | -1.717  |
| 30 | H | 1.917   | -2.2828 | -0.0652 |
| 31 | N | 2.1081  | -0.2931 | -0.6388 |
| 32 | C | 2.5539  | 0.5849  | -1.5871 |
| 33 | C | 2.9385  | 2.0366  | -1.168  |
| 34 | H | 3.3653  | 2.4444  | -2.0948 |
| 35 | N | 1.7903  | 2.9198  | -0.8223 |
| 36 | H | 0.9787  | 2.3972  | -2.7438 |
| 37 | C | 4.0723  | 2.0618  | -0.101  |
| 38 | H | 3.7041  | 1.6091  | 0.8315  |

|    |   |         |         |         |
|----|---|---------|---------|---------|
| 39 | C | 5.2806  | 1.2207  | -0.5764 |
| 40 | H | 6.0766  | 1.2429  | 0.1797  |
| 41 | H | 5.0057  | 0.1732  | -0.7454 |
| 42 | H | 5.6893  | 1.6189  | -1.5162 |
| 43 | C | 4.5138  | 3.5106  | 0.2052  |
| 44 | H | 4.9119  | 3.9912  | -0.7003 |
| 45 | H | 3.676   | 4.1179  | 0.5606  |
| 46 | H | 5.3029  | 3.5158  | 0.97    |
| 47 | C | -4.1195 | -3.2093 | -0.2515 |
| 48 | H | -4.5616 | -2.9777 | -1.2312 |
| 49 | C | -3.4359 | -4.5943 | -0.346  |
| 50 | H | -2.7019 | -4.6238 | -1.1585 |
| 51 | H | -2.9253 | -4.8458 | 0.596   |
| 52 | H | -4.1843 | -5.3762 | -0.5378 |
| 53 | C | -5.2372 | -3.2309 | 0.8124  |
| 54 | H | -5.6901 | -2.2391 | 0.9084  |
| 55 | H | -6.0168 | -3.9567 | 0.5392  |
| 56 | H | -4.8371 | -3.5235 | 1.7956  |
| 57 | O | -2.2439 | -2.2617 | -2.2474 |
| 58 | O | 2.6741  | 0.2416  | -2.8056 |
| 59 | H | -0.4434 | -1.7377 | 0.3735  |
| 60 | H | 1.9906  | -0.0353 | 0.3432  |
| 61 | C | 1.2679  | 0.3786  | 6.9158  |
| 62 | C | 2.6188  | 0.1548  | 7.2663  |
| 63 | C | 3.0871  | 0.5739  | 8.5314  |
| 64 | C | 2.2117  | 1.1923  | 9.4428  |
| 65 | C | 0.8599  | 1.3998  | 9.0986  |
| 66 | C | 0.394   | 0.9936  | 7.8323  |
| 67 | H | 0.9138  | 0.0729  | 5.9325  |
| 68 | H | 4.1391  | 0.4383  | 8.7728  |
| 69 | H | 2.582   | 1.5195  | 10.4129 |
| 70 | H | 0.1825  | 1.8798  | 9.8031  |
| 71 | H | -0.6446 | 1.1592  | 7.5546  |
| 72 | O | 5.0077  | -0.4033 | 6.5466  |
| 73 | C | 4.3257  | -1.734  | 6.6568  |
| 74 | H | 4.5875  | -2.4512 | 5.8816  |
| 75 | H | 4.2532  | -2.125  | 7.671   |
| 76 | C | 3.5219  | -0.5246 | 6.2873  |
| 77 | H | 3.2461  | -0.4242 | 5.2387  |
| 78 | I | 1.1838  | -0.9904 | 2.8477  |

- Lowest energy conformation for [1-Int1(l)]-.

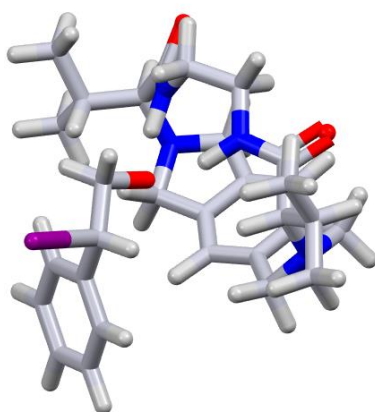

Cartesian coordinates (78 atoms). E (298.15 K) = -1622.585156 Hartree

|    |   |         |         |         |
|----|---|---------|---------|---------|
| 1  | H | -0.8434 | 1.22    | 2.92    |
| 2  | C | -1.1115 | 1.3625  | 1.8777  |
| 3  | C | -1.7044 | 1.5679  | -0.9205 |
| 4  | C | -2.2406 | 0.7533  | 1.3273  |
| 5  | C | -0.249  | 2.0296  | 0.9957  |
| 6  | C | -0.544  | 2.1522  | -0.3739 |
| 7  | C | -2.5268 | 0.831   | -0.0552 |
| 8  | H | -1.9018 | 1.6039  | -1.9901 |
| 9  | C | 1.1581  | 2.515   | 1.2761  |
| 10 | H | 1.1668  | 3.4307  | 1.8922  |
| 11 | H | 1.7122  | 1.7475  | 1.8281  |
| 12 | C | 0.6273  | 2.8266  | -1.0779 |
| 13 | H | 0.3892  | 3.8685  | -1.3513 |
| 14 | C | -3.2021 | -0.2457 | 1.9576  |
| 15 | H | -2.7531 | -0.8398 | 2.7592  |
| 16 | H | -4.0953 | 0.2543  | 2.3674  |
| 17 | C | -3.6752 | -0.1408 | -0.3514 |
| 18 | H | -3.5847 | -0.662  | -1.3061 |
| 19 | H | -4.6514 | 0.3689  | -0.3216 |
| 20 | N | -3.6231 | -1.1108 | 0.8035  |
| 21 | C | -2.7397 | -2.3325 | 0.6275  |
| 22 | H | -2.1248 | -2.4192 | 1.5352  |
| 23 | C | -1.7776 | -2.2458 | -0.5847 |
| 24 | N | -0.4731 | -1.9548 | -0.3448 |
| 25 | C | 0.4402  | -1.833  | -1.4962 |
| 26 | H | 0.3569  | -2.7401 | -2.1119 |
| 27 | H | 0.1292  | -0.9947 | -2.1356 |
| 28 | C | 1.9061  | -1.638  | -1.0669 |
| 29 | H | 2.5411  | -1.7305 | -1.9531 |
| 30 | H | 2.1805  | -2.4145 | -0.3419 |
| 31 | N | 2.1725  | -0.3246 | -0.4559 |
| 32 | C | 2.7348  | 0.6812  | -1.183  |
| 33 | C | 2.9666  | 2.0779  | -0.5236 |
| 34 | H | 3.3739  | 2.6624  | -1.3615 |

|    |   |         |         |         |
|----|---|---------|---------|---------|
| 35 | N | 1.7397  | 2.7827  | -0.0741 |
| 36 | H | 0.915   | 2.3058  | -2.0007 |
| 37 | C | 4.0809  | 2.0336  | 0.5637  |
| 38 | H | 3.7269  | 1.4289  | 1.4119  |
| 39 | C | 5.3565  | 1.3556  | 0.0102  |
| 40 | H | 6.1425  | 1.3437  | 0.7783  |
| 41 | H | 5.1643  | 0.3222  | -0.2996 |
| 42 | H | 5.7388  | 1.8997  | -0.8648 |
| 43 | C | 4.4099  | 3.4548  | 1.0766  |
| 44 | H | 4.7969  | 4.0764  | 0.256   |
| 45 | H | 3.522   | 3.9526  | 1.4783  |
| 46 | H | 5.1781  | 3.4132  | 1.8622  |
| 47 | C | -3.6134 | -3.6168 | 0.5121  |
| 48 | H | -4.2015 | -3.5121 | -0.4105 |
| 49 | C | -2.7363 | -4.8855 | 0.388   |
| 50 | H | -2.1095 | -4.8509 | -0.5096 |
| 51 | H | -2.0814 | -4.9995 | 1.2651  |
| 52 | H | -3.3684 | -5.7827 | 0.3262  |
| 53 | C | -4.5762 | -3.7411 | 1.7116  |
| 54 | H | -5.1694 | -2.8267 | 1.8157  |
| 55 | H | -5.2562 | -4.5949 | 1.5768  |
| 56 | H | -4.0195 | -3.9037 | 2.6481  |
| 57 | O | -2.2208 | -2.458  | -1.7649 |
| 58 | O | 3.0933  | 0.5283  | -2.3976 |
| 59 | H | -0.0825 | -1.6835 | 0.6014  |
| 60 | H | 1.8149  | -0.2651 | 0.522   |
| 61 | C | -0.5076 | -0.5255 | 5.5588  |
| 62 | C | 0.6599  | -0.7423 | 4.7915  |
| 63 | C | 1.6635  | 0.2544  | 4.7979  |
| 64 | C | 1.5049  | 1.4278  | 5.554   |
| 65 | C | 0.3382  | 1.6307  | 6.319   |
| 66 | C | -0.6704 | 0.6475  | 6.3167  |
| 67 | H | -1.2859 | -1.2867 | 5.5653  |
| 68 | H | 2.56    | 0.1104  | 4.2035  |
| 69 | H | 2.2845  | 2.1868  | 5.543   |
| 70 | H | 0.2159  | 2.5413  | 6.902   |
| 71 | H | -1.5778 | 0.7949  | 6.8985  |
| 72 | C | 0.8049  | -2.0104 | 3.999   |
| 73 | H | -0.1581 | -2.4961 | 3.8255  |
| 74 | C | 1.6358  | -1.9787 | 2.706   |
| 75 | H | 2.6674  | -1.6428 | 2.9297  |
| 76 | H | 1.7204  | -3.016  | 2.3261  |
| 77 | O | 0.9351  | -1.1062 | 1.8306  |
| 78 | I | 1.7572  | -3.6523 | 5.4361  |

- Lowest energy conformation for [1-Int2(I)]-

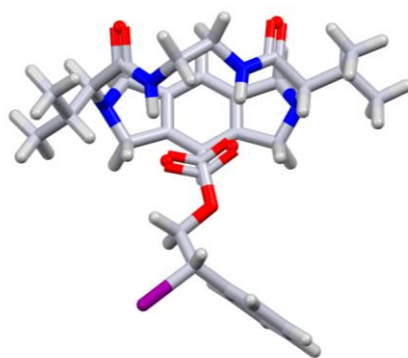

Cartesian coordinates (81 atoms). E (298.15 K) = -1811.16259 Hartree

|    |   |         |         |         |
|----|---|---------|---------|---------|
| 1  | H | 0.0679  | 1.1347  | 3.0308  |
| 2  | C | -0.4126 | 1.3179  | 2.0733  |
| 3  | C | -1.6041 | 1.6814  | -0.5058 |
| 4  | C | -1.6166 | 0.6915  | 1.7356  |
| 5  | C | 0.2158  | 2.0876  | 1.0843  |
| 6  | C | -0.365  | 2.2684  | -0.1862 |
| 7  | C | -2.2105 | 0.8693  | 0.467   |
| 8  | H | -2.0357 | 1.7836  | -1.4994 |
| 9  | C | 1.6072  | 2.694   | 1.1054  |
| 10 | H | 1.6252  | 3.6389  | 1.675   |
| 11 | H | 2.3279  | 2.0153  | 1.5696  |
| 12 | C | 0.6127  | 3.0429  | -1.0677 |
| 13 | H | 0.3017  | 4.095   | -1.1797 |
| 14 | C | -2.3925 | -0.3735 | 2.4987  |
| 15 | H | -1.7375 | -1.061  | 3.043   |
| 16 | H | -3.0929 | 0.077   | 3.2217  |
| 17 | C | -3.4303 | -0.0534 | 0.3779  |
| 18 | H | -3.5594 | -0.5181 | -0.6026 |
| 19 | H | -4.3547 | 0.49    | 0.6314  |
| 20 | N | -3.1737 | -1.0913 | 1.4373  |
| 21 | C | -2.5558 | -2.3849 | 0.9707  |
| 22 | H | -1.8978 | -2.7265 | 1.781   |
| 23 | C | -1.6958 | -2.2204 | -0.3126 |
| 24 | N | -0.3591 | -2.0396 | -0.15   |
| 25 | C | 0.4939  | -1.8316 | -1.3329 |
| 26 | H | 0.412   | -2.7134 | -1.986  |
| 27 | H | 0.1266  | -0.9827 | -1.9204 |
| 28 | C | 1.9773  | -1.6119 | -0.9733 |
| 29 | H | 2.5643  | -1.8456 | -1.8697 |
| 30 | H | 2.2735  | -2.2936 | -0.1675 |
| 31 | N | 2.3265  | -0.2456 | -0.5498 |
| 32 | C | 2.5187  | 0.7342  | -1.4779 |
| 33 | C | 2.969   | 2.1534  | -1.0118 |
| 34 | H | 3.1727  | 2.6621  | -1.9646 |
| 35 | N | 1.9209  | 2.9684  | -0.3332 |
| 36 | H | 0.7083  | 2.6146  | -2.0725 |

|    |   |         |         |         |
|----|---|---------|---------|---------|
| 37 | C | 4.3121  | 2.1135  | -0.2245 |
| 38 | H | 4.1688  | 1.5428  | 0.7041  |
| 39 | C | 5.3979  | 1.3858  | -1.0528 |
| 40 | H | 6.3441  | 1.3572  | -0.4952 |
| 41 | H | 5.1088  | 0.3538  | -1.2821 |
| 42 | H | 5.5773  | 1.9055  | -2.0049 |
| 43 | C | 4.786   | 3.5386  | 0.14    |
| 44 | H | 4.9563  | 4.1318  | -0.7705 |
| 45 | H | 4.0405  | 4.0668  | 0.742   |
| 46 | H | 5.7301  | 3.4973  | 0.702   |
| 47 | C | -3.6475 | -3.4714 | 0.7495  |
| 48 | H | -4.2896 | -3.1205 | -0.0712 |
| 49 | C | -3.0176 | -4.819  | 0.3229  |
| 50 | H | -2.4877 | -4.725  | -0.6308 |
| 51 | H | -2.3075 | -5.1777 | 1.0835  |
| 52 | H | -3.7969 | -5.5856 | 0.2059  |
| 53 | C | -4.507  | -3.6551 | 2.0182  |
| 54 | H | -4.9137 | -2.6922 | 2.3438  |
| 55 | H | -5.3377 | -4.3503 | 1.8273  |
| 56 | H | -3.9055 | -4.0694 | 2.8423  |
| 57 | O | -2.2413 | -2.2397 | -1.4658 |
| 58 | O | 2.3606  | 0.5233  | -2.7248 |
| 59 | H | 0.0718  | -1.9861 | 0.7882  |
| 60 | H | 2.4444  | -0.0984 | 0.4663  |
| 61 | C | 2.564   | -2.7232 | 7.9885  |
| 62 | C | 2.5804  | -1.5859 | 7.149   |
| 63 | C | 1.5925  | -0.5929 | 7.3355  |
| 64 | C | 0.6199  | -0.7321 | 8.3397  |
| 65 | C | 0.6162  | -1.8667 | 9.1749  |
| 66 | C | 1.5924  | -2.8656 | 8.9932  |
| 67 | H | 3.3153  | -3.4987 | 7.8497  |
| 68 | H | 1.5727  | 0.2802  | 6.6903  |
| 69 | H | -0.1392 | 0.0367  | 8.4649  |
| 70 | H | -0.1407 | -1.9742 | 9.9489  |
| 71 | H | 1.5919  | -3.7508 | 9.6256  |
| 72 | C | 3.6326  | -1.4769 | 6.082   |
| 73 | H | 4.0508  | -2.4549 | 5.8377  |
| 74 | C | 3.2829  | -0.717  | 4.7997  |
| 75 | H | 2.9832  | 0.3193  | 5       |
| 76 | H | 4.1348  | -0.6894 | 4.1144  |
| 77 | O | 2.1778  | -1.47   | 4.2092  |
| 78 | C | 1.8903  | -1.2081 | 2.8135  |
| 79 | O | 0.9311  | -1.9009 | 2.3564  |
| 80 | O | 2.6281  | -0.3234 | 2.2421  |
| 81 | I | 5.494   | -0.4375 | 6.9484  |



- Lowest energy conformation for [1·SC·I].

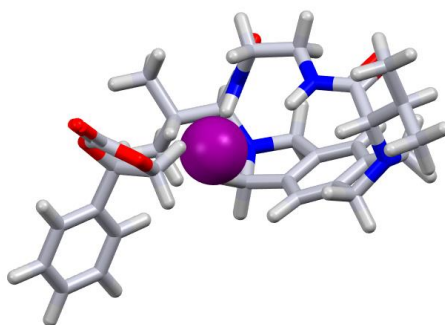

Cartesian coordinates (81 atoms). E (298.15 K) = -1811.172423 Hartree

|    |   |         |         |         |
|----|---|---------|---------|---------|
| 1  | H | -0.2605 | 1.5514  | 2.3963  |
| 2  | C | -0.6234 | 1.6548  | 1.378   |
| 3  | C | -1.5087 | 1.756   | -1.3487 |
| 4  | C | -1.8667 | 1.1401  | 0.996   |
| 5  | C | 0.1942  | 2.1739  | 0.3638  |
| 6  | C | -0.2355 | 2.2279  | -0.9765 |
| 7  | C | -2.309  | 1.1865  | -0.3446 |
| 8  | H | -1.8281 | 1.7571  | -2.3888 |
| 9  | C | 1.6474  | 2.6046  | 0.4551  |
| 10 | H | 1.7413  | 3.6111  | 0.8963  |
| 11 | H | 2.2354  | 1.9278  | 1.0844  |
| 12 | C | 0.9134  | 2.7381  | -1.8429 |
| 13 | H | 0.7565  | 3.7891  | -2.136  |
| 14 | C | -2.8575 | 0.3197  | 1.8102  |
| 15 | H | -2.3709 | -0.3337 | 2.5415  |
| 16 | H | -3.566  | 0.9659  | 2.3536  |
| 17 | C | -3.6298 | 0.4152  | -0.4364 |
| 18 | H | -3.7349 | -0.1726 | -1.351  |
| 19 | H | -4.4912 | 1.0971  | -0.3579 |
| 20 | N | -3.6099 | -0.4723 | 0.7802  |
| 21 | C | -3.0999 | -1.8766 | 0.5776  |
| 22 | H | -2.5637 | -2.1502 | 1.4974  |
| 23 | C | -2.1164 | -2.0055 | -0.6164 |
| 24 | N | -0.7786 | -1.9827 | -0.3486 |
| 25 | C | 0.1912  | -2.0706 | -1.4573 |
| 26 | H | 0.0457  | -3.0309 | -1.9729 |
| 27 | H | -0.0192 | -1.2891 | -2.1956 |
| 28 | C | 1.6555  | -1.9715 | -0.9899 |
| 29 | H | 2.281   | -2.3814 | -1.7902 |
| 30 | H | 1.8078  | -2.5589 | -0.0774 |
| 31 | N | 2.1277  | -0.603  | -0.7166 |
| 32 | C | 2.5659  | 0.2048  | -1.7318 |
| 33 | C | 3.1312  | 1.6224  | -1.4081 |
| 34 | H | 3.4806  | 1.9636  | -2.3923 |
| 35 | N | 2.1251  | 2.6242  | -0.9625 |
| 36 | H | 1.0457  | 2.1534  | -2.7611 |

|    |   |         |         |         |
|----|---|---------|---------|---------|
| 37 | C | 4.3844  | 1.5615  | -0.4855 |
| 38 | H | 4.0944  | 1.1608  | 0.4975  |
| 39 | C | 5.4457  | 0.6044  | -1.0785 |
| 40 | H | 6.329   | 0.5692  | -0.427  |
| 41 | H | 5.0628  | -0.4173 | -1.1823 |
| 42 | H | 5.7667  | 0.9464  | -2.0725 |
| 43 | C | 4.9881  | 2.9692  | -0.2785 |
| 44 | H | 5.3123  | 3.3921  | -1.2404 |
| 45 | H | 4.2587  | 3.6598  | 0.1556  |
| 46 | H | 5.8638  | 2.9168  | 0.3834  |
| 47 | C | -4.2804 | -2.877  | 0.4046  |
| 48 | H | -4.8059 | -2.5975 | -0.5199 |
| 49 | C | -3.7671 | -4.3283 | 0.2476  |
| 50 | H | -3.1427 | -4.439  | -0.6454 |
| 51 | H | -3.1785 | -4.6342 | 1.1256  |
| 52 | H | -4.6135 | -5.0233 | 0.1568  |
| 53 | C | -5.2618 | -2.7765 | 1.5911  |
| 54 | H | -5.5891 | -1.7408 | 1.7272  |
| 55 | H | -6.1424 | -3.4118 | 1.4189  |
| 56 | H | -4.7844 | -3.1123 | 2.5246  |
| 57 | O | -2.5501 | -2.1174 | -1.8069 |
| 58 | O | 2.5365  | -0.1813 | -2.9417 |
| 59 | H | -0.4279 | -1.858  | 0.6037  |
| 60 | H | 2.1205  | -0.3059 | 0.258   |
| 61 | C | 3.2474  | -0.6145 | 6.4838  |
| 62 | C | 3.6623  | -1.9185 | 6.8368  |
| 63 | C | 4.4057  | -2.1157 | 8.0177  |
| 64 | C | 4.7204  | -1.0216 | 8.8469  |
| 65 | C | 4.298   | 0.2758  | 8.5013  |
| 66 | C | 3.5627  | 0.4749  | 7.3154  |
| 67 | H | 2.688   | -0.4606 | 5.562   |
| 68 | H | 4.7554  | -3.1112 | 8.2742  |
| 69 | H | 5.2972  | -1.1833 | 9.7552  |
| 70 | H | 4.5429  | 1.1204  | 9.1422  |
| 71 | H | 3.24    | 1.4749  | 7.034   |
| 72 | C | 1.7995  | -3.5689 | 6.0875  |
| 73 | H | 1.1708  | -2.882  | 6.6526  |
| 74 | H | 1.3431  | -3.8057 | 5.1249  |
| 75 | O | 1.9319  | -4.8211 | 6.8804  |
| 76 | C | 3.2537  | -5.245  | 6.877   |
| 77 | O | 3.6608  | -6.2975 | 7.3541  |
| 78 | O | 4.0565  | -4.2916 | 6.253   |
| 79 | C | 3.2699  | -3.071  | 5.9265  |
| 80 | H | 3.4622  | -2.8238 | 4.8806  |
| 81 | I | 1.3257  | -1.4258 | 2.9061  |

- Lowest energy conformation for [TS1]-.

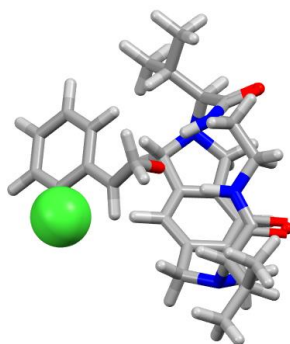

Cartesian coordinates (78 atoms). E (298.15 K) = -1626.120931 Hartree. Imaginary frequency: -253.2  $i$   $\text{cm}^{-1}$

|    |   |         |         |         |
|----|---|---------|---------|---------|
| 1  | H | -0.0831 | 1.6108  | 2.686   |
| 2  | C | -0.4621 | 1.6991  | 1.6716  |
| 3  | C | -1.4044 | 1.8495  | -1.0326 |
| 4  | C | -1.6758 | 1.1171  | 1.2908  |
| 5  | C | 0.3025  | 2.3081  | 0.6654  |
| 6  | C | -0.1583 | 2.3898  | -0.663  |
| 7  | C | -2.1432 | 1.1853  | -0.0411 |
| 8  | H | -1.7467 | 1.8767  | -2.0651 |
| 9  | C | 1.7222  | 2.8434  | 0.7486  |
| 10 | H | 1.7467  | 3.8366  | 1.2269  |
| 11 | H | 2.3756  | 2.1962  | 1.3424  |
| 12 | C | 0.9303  | 3.0215  | -1.5263 |
| 13 | H | 0.6902  | 4.0707  | -1.7651 |
| 14 | C | -2.6121 | 0.2128  | 2.0842  |
| 15 | H | -2.0992 | -0.4287 | 2.8076  |
| 16 | H | -3.3616 | 0.8013  | 2.6375  |
| 17 | C | -3.4103 | 0.33    | -0.1456 |
| 18 | H | -3.4932 | -0.2274 | -1.0812 |
| 19 | H | -4.3141 | 0.9481  | -0.0267 |
| 20 | N | -3.3091 | -0.5993 | 1.0333  |
| 21 | C | -2.6905 | -1.9519 | 0.7746  |
| 22 | H | -2.0849 | -2.1963 | 1.6591  |
| 23 | C | -1.7629 | -1.9738 | -0.4703 |
| 24 | N | -0.4245 | -1.8124 | -0.2732 |
| 25 | C | 0.4748  | -1.7815 | -1.4408 |
| 26 | H | 0.3479  | -2.7155 | -2.0066 |
| 27 | H | 0.1846  | -0.9683 | -2.118  |
| 28 | C | 1.9545  | -1.6265 | -1.0436 |
| 29 | H | 2.5644  | -1.9115 | -1.9064 |
| 30 | H | 2.1863  | -2.2857 | -0.2003 |
| 31 | N | 2.347   | -0.2575 | -0.6644 |
| 32 | C | 2.7929  | 0.6278  | -1.6106 |
| 33 | C | 3.2366  | 2.0658  | -1.1953 |
| 34 | H | 3.5469  | 2.4947  | -2.1583 |
| 35 | N | 2.1647  | 2.9541  | -0.6763 |
| 36 | H | 1.0823  | 2.4941  | -2.4759 |
| 37 | C | 4.505   | 2.0455  | -0.2912 |

|    |    |         |         |         |
|----|----|---------|---------|---------|
| 38 | H  | 4.251   | 1.5853  | 0.6752  |
| 39 | C  | 5.6209  | 1.1896  | -0.9363 |
| 40 | H  | 6.5173  | 1.1972  | -0.3013 |
| 41 | H  | 5.3109  | 0.1473  | -1.0739 |
| 42 | H  | 5.8973  | 1.588   | -1.9223 |
| 43 | C  | 5.0147  | 3.4804  | -0.0267 |
| 44 | H  | 5.3011  | 3.9647  | -0.9715 |
| 45 | H  | 4.2449  | 4.1002  | 0.4425  |
| 46 | H  | 5.8984  | 3.4602  | 0.6266  |
| 47 | C  | -3.792  | -3.0445 | 0.6425  |
| 48 | H  | -4.3863 | -2.7931 | -0.2476 |
| 49 | C  | -3.1704 | -4.4456 | 0.4293  |
| 50 | H  | -2.594  | -4.4911 | -0.501  |
| 51 | H  | -2.5079 | -4.7121 | 1.2667  |
| 52 | H  | -3.9602 | -5.2079 | 0.3767  |
| 53 | C  | -4.7127 | -3.0461 | 1.8807  |
| 54 | H  | -5.1148 | -2.0436 | 2.0574  |
| 55 | H  | -5.548  | -3.747  | 1.7395  |
| 56 | H  | -4.1617 | -3.3599 | 2.7804  |
| 57 | O  | -2.2492 | -2.1261 | -1.6377 |
| 58 | O  | 2.8819  | 0.2967  | -2.834  |
| 59 | H  | -0.0133 | -1.6113 | 0.6533  |
| 60 | H  | 2.1986  | -0.0105 | 0.3124  |
| 61 | Cl | 0.6708  | -2.1473 | 6.1769  |
| 62 | C  | 1.7186  | 0.9258  | 5.1829  |
| 63 | C  | 2.1217  | 0.0682  | 4.1324  |
| 64 | C  | 3.3719  | 0.2925  | 3.5111  |
| 65 | C  | 4.1983  | 1.3523  | 3.9261  |
| 66 | C  | 3.785   | 2.2091  | 4.9647  |
| 67 | C  | 2.5405  | 1.9895  | 5.5902  |
| 68 | H  | 0.7953  | 0.7007  | 5.7083  |
| 69 | H  | 3.6865  | -0.351  | 2.6935  |
| 70 | H  | 5.1595  | 1.5109  | 3.4404  |
| 71 | H  | 4.424   | 3.0295  | 5.2858  |
| 72 | H  | 2.2217  | 2.6339  | 6.4069  |
| 73 | O  | 1.2675  | -1.2217 | 1.9419  |
| 74 | C  | 1.6593  | -2.2189 | 2.9749  |
| 75 | H  | 1.0186  | -3.0982 | 3.0426  |
| 76 | H  | 2.7237  | -2.4655 | 2.9918  |
| 77 | C  | 1.2191  | -1.0296 | 3.709   |
| 78 | H  | 0.1775  | -0.9772 | 3.9829  |

- Lowest energy conformation for [TS2].

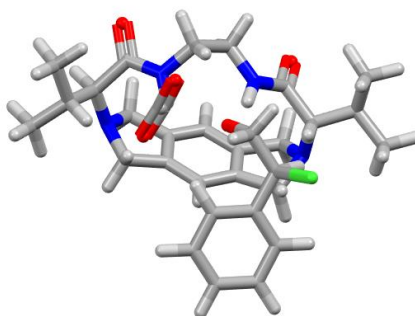

Cartesian coordinates (81 atoms). E (298.15 K) = -1814.675681 Hartree. Imaginary frequency: -23.9 / cm<sup>-1</sup>

|    |   |         |         |         |
|----|---|---------|---------|---------|
| 1  | H | -0.7588 | 1.3164  | 2.8718  |
| 2  | C | -1.0309 | 1.405   | 1.8202  |
| 3  | C | -1.6842 | 1.4936  | -0.9765 |
| 4  | C | -2.1651 | 0.7619  | 1.3139  |
| 5  | C | -0.2024 | 2.0562  | 0.9015  |
| 6  | C | -0.518  | 2.1072  | -0.4757 |
| 7  | C | -2.4937 | 0.8025  | -0.0589 |
| 8  | H | -1.9081 | 1.4927  | -2.0371 |
| 9  | C | 1.1779  | 2.6591  | 1.132   |
| 10 | H | 1.1097  | 3.6389  | 1.6349  |
| 11 | H | 1.8036  | 2.015   | 1.7696  |
| 12 | C | 0.6314  | 2.7588  | -1.2322 |
| 13 | H | 0.3631  | 3.7786  | -1.5709 |
| 14 | C | -3.1283 | -0.1914 | 2.0078  |
| 15 | H | -2.6553 | -0.7787 | 2.8001  |
| 16 | H | -3.9758 | 0.3422  | 2.4501  |
| 17 | C | -3.6779 | -0.1454 | -0.2958 |
| 18 | H | -3.6107 | -0.7029 | -1.2305 |
| 19 | H | -4.6262 | 0.4083  | -0.2737 |
| 20 | N | -3.6282 | -1.0641 | 0.8906  |
| 21 | C | -2.8438 | -2.3459 | 0.7171  |
| 22 | H | -2.3293 | -2.5447 | 1.6662  |
| 23 | C | -1.7568 | -2.2689 | -0.3981 |
| 24 | N | -0.4591 | -2.0803 | -0.0325 |
| 25 | C | 0.5411  | -2.0062 | -1.1143 |
| 26 | H | 0.5668  | -2.9685 | -1.6469 |
| 27 | H | 0.2254  | -1.2554 | -1.8565 |
| 28 | C | 1.9477  | -1.6921 | -0.5867 |
| 29 | H | 2.6709  | -1.9139 | -1.3696 |
| 30 | H | 2.151   | -2.306  | 0.2971  |
| 31 | N | 2.1523  | -0.2717 | -0.2151 |
| 32 | C | 2.8131  | 0.5927  | -1.0446 |
| 33 | C | 2.9827  | 2.0938  | -0.6277 |
| 34 | H | 3.3295  | 2.5555  | -1.5652 |
| 35 | N | 1.7499  | 2.813   | -0.2347 |
| 36 | H | 0.9206  | 2.1869  | -2.1174 |

|    |    |         |         |         |
|----|----|---------|---------|---------|
| 37 | C  | 4.1429  | 2.2867  | 0.403   |
| 38 | H  | 3.8351  | 1.87    | 1.3606  |
| 39 | C  | 5.4238  | 1.5458  | -0.0492 |
| 40 | H  | 6.2314  | 1.7298  | 0.6788  |
| 41 | H  | 5.2686  | 0.4561  | -0.1109 |
| 42 | H  | 5.7584  | 1.8842  | -1.0352 |
| 43 | C  | 4.4392  | 3.7967  | 0.5907  |
| 44 | H  | 4.8029  | 4.2387  | -0.3457 |
| 45 | H  | 3.5391  | 4.3379  | 0.8909  |
| 46 | H  | 5.2118  | 3.9349  | 1.3619  |
| 47 | C  | -3.8018 | -3.542  | 0.4362  |
| 48 | H  | -4.3065 | -3.3197 | -0.5193 |
| 49 | C  | -3.0175 | -4.862  | 0.2622  |
| 50 | H  | -2.3412 | -4.8217 | -0.5904 |
| 51 | H  | -2.4326 | -5.0908 | 1.1606  |
| 52 | H  | -3.7146 | -5.6962 | 0.1074  |
| 53 | C  | -4.8525 | -3.6695 | 1.55    |
| 54 | H  | -5.3691 | -2.7188 | 1.7025  |
| 55 | H  | -5.5933 | -4.4428 | 1.3013  |
| 56 | H  | -4.3838 | -3.9635 | 2.4982  |
| 57 | O  | -2.1071 | -2.3708 | -1.6256 |
| 58 | O  | 3.3277  | 0.2112  | -2.1454 |
| 59 | H  | -0.1142 | -1.9646 | 0.9768  |
| 60 | H  | 1.6756  | 0.0447  | 0.6253  |
| 61 | C  | -1.8369 | -1.0054 | 5.8297  |
| 62 | C  | -0.6793 | -1.2282 | 5.0626  |
| 63 | C  | 0.3376  | -0.2482 | 5.0563  |
| 64 | C  | 0.2055  | 0.9249  | 5.8269  |
| 65 | C  | -0.9552 | 1.1326  | 6.5967  |
| 66 | C  | -1.9815 | 0.1665  | 6.5966  |
| 67 | H  | -2.6227 | -1.7581 | 5.8499  |
| 68 | H  | 1.1977  | -0.3848 | 4.4138  |
| 69 | H  | 0.9965  | 1.6723  | 5.8029  |
| 70 | H  | -1.0527 | 2.0445  | 7.1863  |
| 71 | H  | -2.8757 | 0.3282  | 7.1929  |
| 72 | Cl | -0.591  | -4.0296 | 5.5466  |
| 73 | C  | -0.5473 | -2.5037 | 4.2591  |
| 74 | H  | -1.4601 | -2.723  | 3.6857  |
| 75 | C  | 0.7138  | -2.7049 | 3.3844  |
| 76 | H  | 1.5925  | -2.6637 | 4.0576  |
| 77 | H  | 0.6762  | -3.7418 | 2.9955  |
| 78 | O  | 0.751   | -1.7209 | 2.3472  |
| 79 | C  | 3.363   | -1.1234 | 2.5945  |
| 80 | O  | 3.1603  | -0.0062 | 2.9755  |
| 81 | O  | 3.7182  | -2.2196 | 2.2704  |

- Lowest energy conformation for [TS3]-.

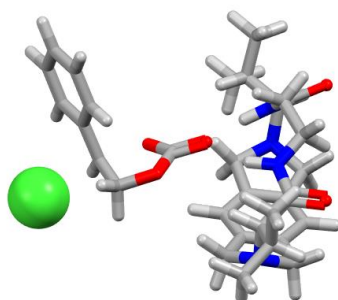

Cartesian coordinates (81 atoms). E (298.15 K) = -1814.699672 Hartree. Imaginary frequency: -282.0  $i$   $\text{cm}^{-1}$

|    |   |         |         |         |
|----|---|---------|---------|---------|
| 1  | H | -0.1779 | 1.1037  | 2.9981  |
| 2  | C | -0.5632 | 1.3026  | 2.001   |
| 3  | C | -1.5217 | 1.7534  | -0.6616 |
| 4  | C | -1.7947 | 0.7929  | 1.5767  |
| 5  | C | 0.2158  | 1.9814  | 1.0521  |
| 6  | C | -0.2546 | 2.213   | -0.2545 |
| 7  | C | -2.2708 | 1.0097  | 0.2639  |
| 8  | H | -1.8715 | 1.8972  | -1.6818 |
| 9  | C | 1.6627  | 2.4306  | 1.1667  |
| 10 | H | 1.7509  | 3.3567  | 1.759   |
| 11 | H | 2.2847  | 1.6788  | 1.6646  |
| 12 | C | 0.8492  | 2.8844  | -1.0661 |
| 13 | H | 0.6483  | 3.9602  | -1.1997 |
| 14 | C | -2.7365 | -0.1783 | 2.2797  |
| 15 | H | -2.2184 | -0.9034 | 2.9153  |
| 16 | H | -3.4689 | 0.3563  | 2.9062  |
| 17 | C | -3.5564 | 0.195   | 0.0841  |
| 18 | H | -3.6614 | -0.2558 | -0.9051 |
| 19 | H | -4.4464 | 0.8133  | 0.2809  |
| 20 | N | -3.4604 | -0.8579 | 1.1548  |
| 21 | C | -2.8763 | -2.1893 | 0.7485  |
| 22 | H | -2.25   | -2.5281 | 1.586   |
| 23 | C | -1.9845 | -2.109  | -0.5201 |
| 24 | N | -0.6376 | -2.0087 | -0.3419 |
| 25 | C | 0.249   | -1.8889 | -1.5132 |
| 26 | H | 0.0943  | -2.7637 | -2.1609 |
| 27 | H | -0.0292 | -1.0101 | -2.108  |
| 28 | C | 1.7365  | -1.8052 | -1.1211 |
| 29 | H | 2.3291  | -2.0156 | -2.0168 |
| 30 | H | 1.9648  | -2.5523 | -0.3532 |
| 31 | N | 2.1639  | -0.4915 | -0.6115 |
| 32 | C | 2.6424  | 0.4713  | -1.4574 |
| 33 | C | 3.1316  | 1.8365  | -0.879  |
| 34 | H | 3.4482  | 2.37    | -1.7862 |
| 35 | N | 2.0881  | 2.6839  | -0.245  |
| 36 | H | 0.969   | 2.4455  | -2.0642 |
| 37 | C | 4.4044  | 1.6699  | 0.004   |
| 38 | H | 4.1443  | 1.1037  | 0.9106  |

|    |    |         |         |         |
|----|----|---------|---------|---------|
| 39 | C  | 5.4886  | 0.8632  | -0.7491 |
| 40 | H  | 6.3873  | 0.767   | -0.1251 |
| 41 | H  | 5.1436  | -0.1451 | -1.0042 |
| 42 | H  | 5.7716  | 1.3668  | -1.6838 |
| 43 | C  | 4.961   | 3.047   | 0.432   |
| 44 | H  | 5.2657  | 3.6279  | -0.4505 |
| 45 | H  | 4.2109  | 3.6334  | 0.9711  |
| 46 | H  | 5.8414  | 2.9206  | 1.0774  |
| 47 | C  | -4.0016 | -3.2452 | 0.5419  |
| 48 | H  | -4.6114 | -2.9017 | -0.306  |
| 49 | C  | -3.4122 | -4.6305 | 0.1832  |
| 50 | H  | -2.8613 | -4.5986 | -0.763  |
| 51 | H  | -2.7315 | -4.9835 | 0.9726  |
| 52 | H  | -4.217  | -5.372  | 0.0822  |
| 53 | C  | -4.8947 | -3.3474 | 1.796   |
| 54 | H  | -5.279  | -2.36   | 2.0709  |
| 55 | H  | -5.7426 | -4.023  | 1.6129  |
| 56 | H  | -4.3276 | -3.7463 | 2.6511  |
| 57 | O  | -2.5024 | -2.13   | -1.6828 |
| 58 | O  | 2.7225  | 0.2762  | -2.7107 |
| 59 | H  | -0.2149 | -1.9127 | 0.5877  |
| 60 | H  | 2.0368  | -0.3487 | 0.3891  |
| 61 | C  | 3.9835  | -1.6312 | 6.4677  |
| 62 | C  | 2.8088  | -2.1802 | 5.9058  |
| 63 | C  | 2.816   | -3.5332 | 5.4964  |
| 64 | C  | 3.9708  | -4.3182 | 5.6505  |
| 65 | C  | 5.1365  | -3.7633 | 6.2128  |
| 66 | C  | 5.1378  | -2.4132 | 6.62    |
| 67 | H  | 3.977   | -0.5958 | 6.7988  |
| 68 | H  | 1.9262  | -3.9715 | 5.0519  |
| 69 | H  | 3.9632  | -5.3584 | 5.3317  |
| 70 | H  | 6.0303  | -4.3724 | 6.3329  |
| 71 | H  | 6.033   | -1.9794 | 7.0605  |
| 72 | Cl | 0.7908  | -1.4773 | 8.1359  |
| 73 | C  | 1.6187  | -1.3151 | 5.7184  |
| 74 | H  | 1.6756  | -0.2993 | 6.0725  |
| 75 | C  | 0.2529  | -1.8805 | 5.3306  |
| 76 | H  | 0.0505  | -2.8284 | 5.8243  |
| 77 | H  | -0.5352 | -1.1665 | 5.5724  |
| 78 | O  | 0.1975  | -2.1614 | 3.8615  |
| 79 | C  | 1.1476  | -1.4197 | 3.1425  |
| 80 | O  | 1.1352  | -1.4835 | 1.8848  |
| 81 | O  | 1.956   | -0.7193 | 3.9066  |



- Lowest energy conformation for [TS1(I)].

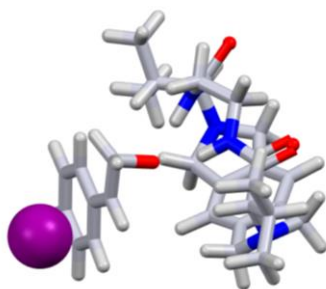

Cartesian coordinates (78 atoms). E (298.15 K) = -1622.574526 Hartree. Imaginary frequency: -226.5  $i$   $\text{cm}^{-1}$

|    |   |         |         |         |
|----|---|---------|---------|---------|
| 1  | H | -0.0853 | 1.5625  | 2.7006  |
| 2  | C | -0.4707 | 1.6758  | 1.6915  |
| 3  | C | -1.4175 | 1.8651  | -1.0082 |
| 4  | C | -1.6908 | 1.111   | 1.3075  |
| 5  | C | 0.297   | 2.2898  | 0.6914  |
| 6  | C | -0.1659 | 2.3903  | -0.6351 |
| 7  | C | -2.1608 | 1.197   | -0.0223 |
| 8  | H | -1.7605 | 1.9051  | -2.04   |
| 9  | C | 1.7232  | 2.8053  | 0.7781  |
| 10 | H | 1.7629  | 3.7907  | 1.2711  |
| 11 | H | 2.3687  | 2.1396  | 1.3602  |
| 12 | C | 0.9292  | 3.0166  | -1.4943 |
| 13 | H | 0.7005  | 4.0699  | -1.7261 |
| 14 | C | -2.6289 | 0.2035  | 2.0936  |
| 15 | H | -2.1124 | -0.4509 | 2.8031  |
| 16 | H | -3.3713 | 0.7889  | 2.6601  |
| 17 | C | -3.4333 | 0.3503  | -0.1332 |
| 18 | H | -3.52   | -0.1983 | -1.0737 |
| 19 | H | -4.3336 | 0.9722  | -0.0084 |
| 20 | N | -3.337  | -0.5911 | 1.0372  |
| 21 | C | -2.732  | -1.9471 | 0.7645  |
| 22 | H | -2.1275 | -2.2057 | 1.6457  |
| 23 | C | -1.8049 | -1.965  | -0.4805 |
| 24 | N | -0.4653 | -1.8119 | -0.2831 |
| 25 | C | 0.4309  | -1.7801 | -1.4535 |
| 26 | H | 0.2934  | -2.7092 | -2.0246 |
| 27 | H | 0.1449  | -0.96   | -2.1241 |
| 28 | C | 1.9132  | -1.6393 | -1.0624 |
| 29 | H | 2.517   | -1.9167 | -1.9317 |
| 30 | H | 2.1459  | -2.313  | -0.2307 |
| 31 | N | 2.3149  | -0.2774 | -0.668  |
| 32 | C | 2.7784  | 0.6092  | -1.6042 |
| 33 | C | 3.2295  | 2.041   | -1.1762 |
| 34 | H | 3.5407  | 2.4777  | -2.1353 |
| 35 | N | 2.1633  | 2.9291  | -0.646  |
| 36 | H | 1.0743  | 2.494   | -2.4477 |
| 37 | C | 4.4992  | 2.0049  | -0.2742 |

|    |   |         |         |         |
|----|---|---------|---------|---------|
| 38 | H | 4.2431  | 1.5385  | 0.6887  |
| 39 | C | 5.6087  | 1.1466  | -0.9271 |
| 40 | H | 6.5065  | 1.1453  | -0.294  |
| 41 | H | 5.2924  | 0.1069  | -1.07   |
| 42 | H | 5.8851  | 1.5488  | -1.9114 |
| 43 | C | 5.0187  | 3.4344  | 0.0006  |
| 44 | H | 5.3108  | 3.9226  | -0.9404 |
| 45 | H | 4.2519  | 4.0567  | 0.4717  |
| 46 | H | 5.9008  | 3.4038  | 0.6556  |
| 47 | C | -3.8436 | -3.0278 | 0.622   |
| 48 | H | -4.4361 | -2.7619 | -0.2651 |
| 49 | C | -3.236  | -4.4326 | 0.3943  |
| 50 | H | -2.6627 | -4.4749 | -0.538  |
| 51 | H | -2.5735 | -4.7136 | 1.2269  |
| 52 | H | -4.0331 | -5.1868 | 0.3366  |
| 53 | C | -4.7642 | -3.033  | 1.8604  |
| 54 | H | -5.1551 | -2.0281 | 2.0485  |
| 55 | H | -5.6072 | -3.7228 | 1.7114  |
| 56 | H | -4.2168 | -3.3642 | 2.7563  |
| 57 | O | -2.2925 | -2.107  | -1.6484 |
| 58 | O | 2.8787  | 0.285   | -2.8287 |
| 59 | H | -0.0545 | -1.6094 | 0.6431  |
| 60 | H | 2.1498  | -0.0393 | 0.31    |
| 61 | C | 1.6615  | 1.0245  | 5.0328  |
| 62 | C | 2.2207  | 0.0678  | 4.1515  |
| 63 | C | 3.5243  | 0.2924  | 3.6474  |
| 64 | C | 4.2443  | 1.4415  | 4.0134  |
| 65 | C | 3.6769  | 2.388   | 4.89    |
| 66 | C | 2.3807  | 2.172   | 5.4     |
| 67 | H | 0.6785  | 0.8376  | 5.4583  |
| 68 | H | 3.9746  | -0.4317 | 2.974   |
| 69 | H | 5.2475  | 1.5981  | 3.6221  |
| 70 | H | 4.2375  | 3.2748  | 5.1765  |
| 71 | H | 1.9401  | 2.8897  | 6.0887  |
| 72 | O | 1.2266  | -1.1688 | 1.9282  |
| 73 | C | 1.843   | -2.157  | 2.8361  |
| 74 | H | 1.3123  | -3.1072 | 2.9204  |
| 75 | H | 2.917   | -2.3061 | 2.6929  |
| 76 | C | 1.4188  | -1.1095 | 3.7752  |
| 77 | H | 0.4074  | -1.1755 | 4.1508  |
| 78 | I | 1.5772  | -2.7573 | 6.4298  |

- Lowest energy conformation for [TS2(I)].

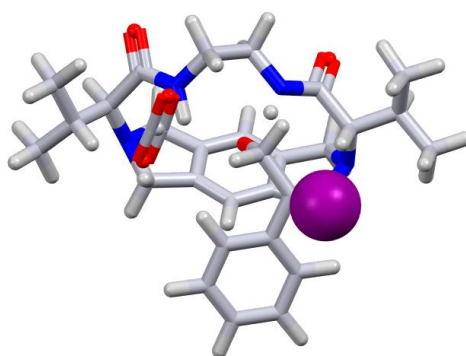

Cartesian coordinates (81 atoms). E (298.15 K) = -1811.117787 Hartree. Imaginary frequency: -21.0  $i$   $\text{cm}^{-1}$

|    |   |         |         |         |
|----|---|---------|---------|---------|
| 1  | H | -0.7975 | 1.2426  | 2.8935  |
| 2  | C | -1.0701 | 1.3532  | 1.8479  |
| 3  | C | -1.7099 | 1.4955  | -0.946  |
| 4  | C | -2.2007 | 0.7195  | 1.3242  |
| 5  | C | -0.236  | 2.0261  | 0.9417  |
| 6  | C | -0.5483 | 2.1003  | -0.4297 |
| 7  | C | -2.5182 | 0.7788  | -0.0514 |
| 8  | H | -1.9254 | 1.5084  | -2.0124 |
| 9  | C | 1.1385  | 2.6239  | 1.1924  |
| 10 | H | 1.0672  | 3.5948  | 1.7112  |
| 11 | H | 1.7575  | 1.9769  | 1.8251  |
| 12 | C | 0.6005  | 2.7726  | -1.172  |
| 13 | H | 0.3355  | 3.7939  | -1.4912 |
| 14 | C | -3.1589 | -0.2536 | 1.9951  |
| 15 | H | -2.6846 | -0.8558 | 2.7727  |
| 16 | H | -4.0121 | 0.2752  | 2.4513  |
| 17 | C | -3.6993 | -0.1632 | -0.3078 |
| 18 | H | -3.63   | -0.7097 | -1.256  |
| 19 | H | -4.6552 | 0.3841  | -0.2837 |
| 20 | N | -3.6617 | -1.1054 | 0.8669  |
| 21 | C | -2.8789 | -2.3845 | 0.6693  |
| 22 | H | -2.3735 | -2.5931 | 1.622   |
| 23 | C | -1.7944 | -2.2924 | -0.4371 |
| 24 | N | -0.5058 | -2.103  | -0.0578 |
| 25 | C | 0.5173  | -2.0063 | -1.1148 |
| 26 | H | 0.5546  | -2.9571 | -1.6691 |
| 27 | H | 0.2277  | -1.2401 | -1.8459 |
| 28 | C | 1.9165  | -1.7063 | -0.5513 |
| 29 | H | 2.6588  | -1.9293 | -1.3222 |
| 30 | H | 2.0975  | -2.3301 | 0.3278  |
| 31 | N | 2.1198  | -0.2947 | -0.1616 |
| 32 | C | 2.7713  | 0.5848  | -0.994  |
| 33 | C | 2.9456  | 2.0819  | -0.5717 |
| 34 | H | 3.2881  | 2.5398  | -1.513  |
| 35 | N | 1.7179  | 2.8061  | -0.1738 |
| 36 | H | 0.8984  | 2.2151  | -2.0684 |

|    |   |         |         |         |
|----|---|---------|---------|---------|
| 37 | C | 4.1085  | 2.2711  | 0.4522  |
| 38 | H | 3.8021  | 1.8524  | 1.426   |
| 39 | C | 5.3859  | 1.5241  | 0.0026  |
| 40 | H | 6.1983  | 1.7087  | 0.7192  |
| 41 | H | 5.2297  | 0.4416  | -0.0667 |
| 42 | H | 5.7144  | 1.8685  | -0.9872 |
| 43 | C | 4.4089  | 3.7752  | 0.648   |
| 44 | H | 4.7728  | 4.2195  | -0.289  |
| 45 | H | 3.5105  | 4.3234  | 0.949   |
| 46 | H | 5.185   | 3.9166  | 1.413   |
| 47 | C | -3.8449 | -3.5697 | 0.373   |
| 48 | H | -4.3518 | -3.3376 | -0.574  |
| 49 | C | -3.0697 | -4.8967 | 0.193   |
| 50 | H | -2.3877 | -4.846  | -0.662  |
| 51 | H | -2.4831 | -5.1348 | 1.093   |
| 52 | H | -3.7693 | -5.7274 | 0.022   |
| 53 | C | -4.9017 | -3.7098 | 1.489   |
| 54 | H | -5.4146 | -2.7557 | 1.647   |
| 55 | H | -5.6442 | -4.4769 | 1.225   |
| 56 | H | -4.432  | -4.0135 | 2.437   |
| 57 | O | -2.1346 | -2.3973 | -1.666  |
| 58 | O | 3.2717  | 0.2129  | -2.096  |
| 59 | H | -0.1815 | -1.9744 | 0.953   |
| 60 | H | 1.645   | 0.0039  | 0.686   |
| 61 | C | -1.878  | -0.8086 | 5.61    |
| 62 | C | -0.6272 | -1.1706 | 5.055   |
| 63 | C | 0.4667  | -0.2937 | 5.235   |
| 64 | C | 0.316   | 0.8987  | 5.966   |
| 65 | C | -0.9305 | 1.2418  | 6.526   |
| 66 | C | -2.0314 | 0.3815  | 6.341   |
| 67 | H | -2.7286 | -1.4761 | 5.483   |
| 68 | H | 1.4202  | -0.5247 | 4.777   |
| 69 | H | 1.1684  | 1.5641  | 6.087   |
| 70 | H | -1.0443 | 2.1658  | 7.089   |
| 71 | H | -3.0018 | 0.638   | 6.761   |
| 72 | C | -0.4934 | -2.4579 | 4.29    |
| 73 | H | -1.4227 | -2.7319 | 3.785   |
| 74 | C | 0.7211  | -2.6564 | 3.365   |
| 75 | H | 1.6441  | -2.5813 | 3.976   |
| 76 | H | 0.6916  | -3.696  | 2.986   |
| 77 | O | 0.6388  | -1.6774 | 2.337   |
| 78 | C | 3.5225  | -1.1487 | 2.627   |
| 79 | O | 3.2986  | -0.0668 | 3.083   |
| 80 | O | 3.8509  | -2.2151 | 2.207   |
| 81 | I | -0.458  | -4.2392 | 5.868   |

- Lowest energy conformation for [TS3(I)].

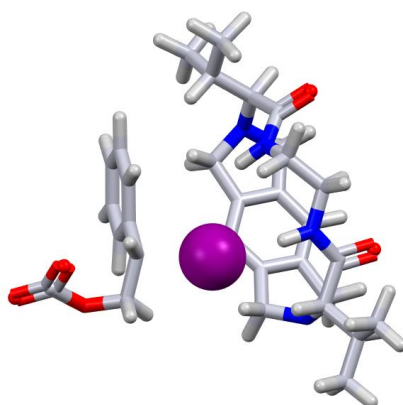

Cartesian coordinates (81 atoms). E (298.15 K) = -1811.122363 Hartree. Imaginary frequency: -53.0  $i$   $\text{cm}^{-1}$

|    |   |         |         |         |
|----|---|---------|---------|---------|
| 1  | H | -0.0505 | 0.6052  | 3.3033  |
| 2  | C | -0.4549 | 0.9533  | 2.3554  |
| 3  | C | -1.482  | 1.8155  | -0.1798 |
| 4  | C | -1.6766 | 0.4749  | 1.8625  |
| 5  | C | 0.2697  | 1.8332  | 1.535   |
| 6  | C | -0.2256 | 2.2443  | 0.2808  |
| 7  | C | -2.1942 | 0.9114  | 0.6231  |
| 8  | H | -1.8569 | 2.1126  | -1.1566 |
| 9  | C | 1.6718  | 2.3994  | 1.7276  |
| 10 | H | 1.6468  | 3.281   | 2.3893  |
| 11 | H | 2.371   | 1.6913  | 2.185   |
| 12 | C | 0.8422  | 3.0733  | -0.427  |
| 13 | H | 0.5977  | 4.1465  | -0.4017 |
| 14 | C | -2.5893 | -0.6163 | 2.4115  |
| 15 | H | -2.0477 | -1.4497 | 2.8714  |
| 16 | H | -3.281  | -0.2135 | 3.1683  |
| 17 | C | -3.4914 | 0.1489  | 0.346   |
| 18 | H | -3.6205 | -0.1268 | -0.7028 |
| 19 | H | -4.3661 | 0.7363  | 0.666   |
| 20 | N | -3.3798 | -1.0694 | 1.2194  |
| 21 | C | -2.8634 | -2.3084 | 0.5444  |
| 22 | H | -2.3981 | -2.9178 | 1.3324  |
| 23 | C | -1.7977 | -2.0097 | -0.5503 |
| 24 | N | -0.4789 | -2.1411 | -0.1994 |
| 25 | C | 0.5982  | -1.9283 | -1.1846 |
| 26 | H | 0.6774  | -2.8164 | -1.8303 |
| 27 | H | 0.3215  | -1.093  | -1.8322 |
| 28 | C | 1.978   | -1.6783 | -0.5409 |
| 29 | H | 2.736   | -1.9075 | -1.2969 |
| 30 | H | 2.1293  | -2.3503 | 0.3132  |
| 31 | N | 2.2305  | -0.3003 | -0.0876 |
| 32 | C | 2.7441  | 0.6512  | -0.9371 |
| 33 | C | 3.1453  | 2.0458  | -0.3608 |
| 34 | H | 3.3828  | 2.6188  | -1.2668 |
| 35 | N | 2.0945  | 2.8129  | 0.3535  |

|    |   |         |         |         |
|----|---|---------|---------|---------|
| 36 | H | 0.9728  | 2.7896  | -1.4777 |
| 37 | C | 4.4688  | 1.9467  | 0.4637  |
| 38 | H | 4.2667  | 1.3896  | 1.3903  |
| 39 | C | 5.5611  | 1.1735  | -0.3109 |
| 40 | H | 6.4964  | 1.1724  | 0.2658  |
| 41 | H | 5.2764  | 0.1311  | -0.4959 |
| 42 | H | 5.7586  | 1.6409  | -1.2845 |
| 43 | C | 4.9735  | 3.3571  | 0.8413  |
| 44 | H | 5.248   | 3.918   | -0.0665 |
| 45 | H | 4.2     | 3.9329  | 1.3671  |
| 46 | H | 5.866   | 3.2872  | 1.4811  |
| 47 | C | -4.0309 | -3.1391 | -0.0645 |
| 48 | H | -4.4959 | -2.5208 | -0.8457 |
| 49 | C | -3.5083 | -4.4348 | -0.7279 |
| 50 | H | -2.8304 | -4.2161 | -1.5588 |
| 51 | H | -2.978  | -5.0632 | 0.0013  |
| 52 | H | -4.347  | -5.0235 | -1.1238 |
| 53 | C | -5.0873 | -3.4699 | 1.0103  |
| 54 | H | -5.4234 | -2.558  | 1.5119  |
| 55 | H | -5.9549 | -3.97   | 0.5575  |
| 56 | H | -4.6722 | -4.1456 | 1.7726  |
| 57 | O | -2.1389 | -1.646  | -1.7162 |
| 58 | O | 2.953   | 0.397   | -2.159  |
| 59 | H | -0.2319 | -2.4726 | 0.731   |
| 60 | H | 1.9878  | -0.0555 | 0.8644  |
| 61 | C | 3.7442  | -1.8749 | 4.3621  |
| 62 | C | 2.4682  | -1.9644 | 4.9699  |
| 63 | C | 1.8405  | -0.774  | 5.4139  |
| 64 | C | 2.4686  | 0.4704  | 5.2338  |
| 65 | C | 3.7314  | 0.5485  | 4.6131  |
| 66 | C | 4.3712  | -0.6328 | 4.1813  |
| 67 | H | 4.2413  | -2.7878 | 4.0394  |
| 68 | H | 0.8979  | -0.8329 | 5.9468  |
| 69 | H | 1.9865  | 1.3753  | 5.5992  |
| 70 | H | 4.221   | 1.5132  | 4.4881  |
| 71 | H | 5.3564  | -0.5835 | 3.7207  |
| 72 | C | 1.8469  | -3.3036 | 5.1586  |
| 73 | H | 2.5583  | -4.1194 | 5.1917  |
| 74 | C | 0.6765  | -3.4702 | 6.1426  |
| 75 | H | -0.2235 | -2.9634 | 5.7748  |
| 76 | H | 0.469   | -4.5431 | 6.2437  |
| 77 | O | 0.9459  | -2.8615 | 7.4325  |
| 78 | C | 2.1707  | -3.3867 | 8.1488  |
| 79 | O | 2.2761  | -2.9442 | 9.3158  |
| 80 | O | 2.8795  | -4.1771 | 7.4257  |
| 81 | I | 0.8432  | -3.9936 | 3.0109  |
